# Supplementary material for: The Dynamics and Prognostic Potential of DNA Methylation Changes at Stem Cell Gene Loci in Women's Cancer
Source: PLoS Genet. 2012 Feb 9;8(2):e1002517. doi: 10.1371/journal.pgen.1002517 (PMC3276553; doi:10.1371/journal.pgen.1002517)
Supplement: Table S6 — MESC CpGs according to the frequency of hypomethylation (cancer vs normal) as defined by the demethylation (2->0/1) instability index (DeMI) in the endometrial, breast, ovarian, and cervical cancers. (XLS) [file pgen.1002517.s016.xls]

## Sheet: Endo CA
IlmnID	Chromosome	GeneID	Gene Symbol	PCGT	colon-PMD	IMR-PMD	MESC	HypoM-freq(Cancer)
cg23834593	chr20	3172	HNF4A	0	0	0	1	0.734
cg13833831	chr19	4145	MATK	0	0	0	1	0.672
cg06244417	chr9	2219	FCN1	0	0	1	1	0.672
cg03366382	chr11	3630	INS	0	1	0	1	0.656
cg11884243	chr9	2220	FCN2	0	0	0	1	0.594
cg09864990	chr20	140628	GATA5	0	1	0	1	0.578
cg24775607	chr16	6755	SSTR5	0	1	0	1	0.562
cg09276978	chr20	22839	DLGAP4	0	1	1	1	0.547
cg10129493	chr19	945	CD33	0	1	1	1	0.547
cg27291231	chr9	8636	SSNA1	0	0	0	1	0.547
cg27218220	chr9	158135	TTLL11	0	0	0	1	0.516
cg14188111	chr1	6284	S100A13	0	0	0	1	0.5
cg16953612	chr3	165721	DNAJB8	0	0	0	1	0.484
cg00974864	chr1	2215	FCGR3B	0	1	0	1	0.484
cg10062065	chr2	10290	SPEG	0	1	0	1	0.469
cg08687163	chr3	4486	MST1R	0	0	0	1	0.469
cg18877514	chr12	5827	PXMP2	0	0	0	1	0.469
cg23878206	chr19	22809	ATF5	0	0	0	1	0.469
cg26149550	chr19	55554	KLK15	0	1	0	1	0.469
cg21522797	chr16	5336	PLCG2	0	1	0	1	0.453
cg18493147	chr19	284451	ODF3L2	0	0	0	1	0.453
cg00491404	chr1	79574	EPS8L3	0	0	0	1	0.438
cg11340260	chr17	2811	GP1BA	0	0	0	1	0.438
cg23240895	chr22	55615	PRR5	0	1	0	1	0.438
cg05338167	chr15	91860	CALML4	0	0	0	1	0.438
cg20822628	chr20	140628	GATA5	0	1	0	1	0.422
cg24926042	chr12	3888	KRT82	0	1	0	1	0.406
cg10157098	chr7	84691	FAM71F1	0	0	0	1	0.406
cg20931907	chrX	340602	CXorf67	0	1	1	1	0.391
cg18140857	chr8	195814	SDR16C5	NA	NA	NA	1	0.375
cg03022541	chr3	165721	DNAJB8	0	0	0	1	0.375
cg20281815	chr8	8000	PSCA	0	1	0	1	0.359
cg10883352	chr3	5088	PBX2P1	0	0	0	1	0.344
cg17518965	chr19	8698	S1PR4	0	0	0	1	0.344
cg25058957	chr19	84839	RAX2	0	0	0	1	0.344
cg25134071	chr19	11202	KLK8	0	1	1	1	0.344
cg20583073	chr19	8698	S1PR4	0	0	0	1	0.328
cg10673431	chr1	6282	S100A11	0	1	0	1	0.328
cg04089739	chr19	718	C3	0	0	0	1	0.312
cg27610561	chr20	81031	SLC2A10	0	0	0	1	0.312
cg04499381	chrX	54440	SASH3	0	0	0	1	0.312
cg05782292	chr11	6343	SCT	NA	NA	NA	1	0.312
cg04697562	chr7	221914	GPC2	1	0	0	1	0.312
cg07008350	chr18	162699	TCEB3C	0	0	0	1	0.312
cg24423088	chr21	337879	KRTAP8-1	0	1	1	1	0.312
cg20576002	chr12	121355	GTSF1	0	1	0	1	0.297
cg24399405	chr16	8131	C16orf35	NA	NA	NA	1	0.297
cg18729973	chr21	7031	TFF1	0	0	1	1	0.297
cg19882093	chr20	92086	GGTLC1	0	1	1	1	0.297
cg11767711	chr19	333	APLP1	1	1	0	1	0.281
cg05942970	chr10	282973	JAKMIP3	0	0	0	1	0.281
cg13118849	chr19	1463	NCAN	0	0	0	1	0.281
cg13685294	chr3	2912	GRM2	1	0	0	1	0.281
cg20425130	chr3	89857	KLHL6	0	0	0	1	0.266
cg09643186	chr14	2877	GPX2	0	0	0	1	0.266
cg12391048	chr16	83886	PRSS27	0	0	0	1	0.266
cg12864581	chr1	79570	NKAIN1	0	0	0	1	0.266
cg15379858	chr8	55790	CSGALNACT1	0	0	0	1	0.266
cg04037952	chr2	344561	GPR148	0	0	1	1	0.266
cg06590610	chr7	10320	IKZF1	0	0	0	1	0.266
cg11834681	chr19	1553	CYP2A13	0	0	1	1	0.25
cg13126790	chr6	401281	FLJ27255	0	1	0	1	0.25
cg00273124	chr5	55651	NHP2	0	0	0	1	0.25
cg25551168	chr20	551	AVP	0	0	0	1	0.25
cg03842617	chr7	4846	NOS3	0	0	0	1	0.234
cg00800095	chrX	29944	PNMA3	0	1	1	1	0.234
cg09750183	chr11	5222	PGA5	0	0	0	1	0.234
cg02582754	chr6	4142	MAS1	0	0	0	1	0.234
cg08351331	chr20	3929	LBP	0	1	0	1	0.234
cg12815916	chr2	26469	PTPN18	1	0	0	1	0.219
cg00441136	chr20	9371	KIF3B	0	0	0	1	0.219
cg10248727	chr9	3933	LCN1	0	1	0	1	0.219
cg01497527	chr15	348094	ANKDD1A	0	0	0	1	0.219
cg25829729	chr13	54937	SOHLH2	0	1	0	1	0.219
cg16542081	chr20	140628	GATA5	0	1	0	1	0.219
cg26738010	chr18	1068	CETN1	0	1	0	1	0.219
cg21378206	chr2	26525	IL1F5	0	0	1	1	0.219
cg14519350	chr22	5008	OSM	0	0	0	1	0.219
cg19149785	chr19	11202	KLK8	0	1	1	1	0.203
cg07440877	chr13	400110	FLJ46358	0	0	0	1	0.203
cg15657668	chrX	537	ATP6AP1	0	0	0	1	0.203
cg06791867	chr11	90139	TSPAN18	0	1	0	1	0.203
cg06799664	chr17	8632	DNAH17	0	0	0	1	0.203
cg07349094	chr2	3899	AFF3	0	1	0	1	0.203
cg03243506	chr20	117532	TMC2	0	0	0	1	0.188
cg18524091	chr1	80834	TAS1R2	0	1	1	1	0.188
cg22789545	chr20	92747	C20orf114	0	1	1	1	0.188
cg13994177	chr15	692236	SNORD116@	0	0	0	1	0.188
cg16777782	chr16	1012	CDH13	0	0	0	1	0.188
cg12858514	chr1	51702	PADI3	0	0	0	1	0.188
cg13453139	chr17	23533	PIK3R5	0	1	1	1	0.188
cg14079785	chr8	6440	SFTPC	1	0	0	1	0.188
cg03364504	chr1	388666	FLJ36116	0	0	0	1	0.188
cg16825643	chr16	9780	FAM38A	0	0	0	1	0.188
cg12428416	chr13	2700	GJA3	0	0	0	1	0.188
cg19056418	chr17	147138	TMC8	1	0	0	1	0.188
cg05959508	chr1	80342	TRAF3IP3	0	0	0	1	0.188
cg01309153	chr9	6834	SURF1	0	0	0	1	0.172
cg04898512	chr19	10365	KLF2	1	0	0	1	0.172
cg08245789	chr22	150350	ENTHD1	0	1	0	1	0.172
cg09508556	chr6	170680	PSORS1C2	0	0	0	1	0.172
cg02100848	chr3	51066	C3orf32	0	0	0	1	0.172
cg02643667	chr21	7031	TFF1	0	0	1	1	0.172
cg02701137	chr20	22839	DLGAP4	0	1	1	1	0.172
cg06236276	chr6	6582	SLC22A2	0	0	1	1	0.172
cg00062776	chr19	7288	TULP2	0	0	0	1	0.172
cg25115460	chr1	7161	TP73	0	0	0	1	0.172
cg00434413	chrX	8260	ARD1A	0	0	0	1	0.156
cg00988256	chr19	26526	TSPAN16	0	0	0	1	0.156
cg13625403	chr11	23650	TRIM29	0	0	1	1	0.156
cg26813458	chr19	4680	CEACAM6	0	0	1	1	0.156
cg15616400	chr1	284723	SLC25A34	0	0	0	1	0.156
cg14761227	chr7	1357	CPA1	0	0	0	1	0.156
cg18604842	chr22	164592	CCDC116	0	0	0	1	0.156
cg12038710	chr8	1015	CDH17	0	0	0	1	0.156
cg21898046	chr5	4245	MGAT1	0	0	0	1	0.156
cg08418332	chr9	6363	CCL19	0	1	0	1	0.156
cg18705067	chr7	222183	SRRM3	0	1	0	1	0.156
cg07498879	chr22	5008	OSM	0	0	0	1	0.156
cg05910970	chr19	1548	CYP2A6	0	0	0	1	0.141
cg08097657	chr3	7869	SEMA3B	0	0	0	1	0.141
cg13696012	chr20	80341	BPIL1	0	1	1	1	0.141
cg18589858	chr11	11309	SLCO2B1	0	1	0	1	0.141
cg09382492	chr17	15	AANAT	0	0	0	1	0.141
cg27276456	chr19	201516	ZSCAN4	NA	NA	NA	1	0.141
cg04300115	chr20	85441	PRIC285	0	0	0	1	0.141
cg21578541	chr3	54106	TLR9	0	0	0	1	0.141
cg06090864	chr19	2864	FFAR1	0	1	1	1	0.141
cg00563932	chr9	5730	PTGDS	0	0	0	1	0.141
cg02449608	chr19	147685	C19orf18	0	0	0	1	0.141
cg12939547	chr6	80737	C6orf27	0	0	0	1	0.125
cg14014613	chr17	4994	OR3A1	0	0	1	1	0.125
cg16332224	chr20	8813	DPM1	0	0	0	1	0.125
cg23106779	chrX	1527	TEX28	0	0	0	1	0.125
cg15639951	chr17	9020	MAP3K14	0	0	0	1	0.125
cg05384917	chr12	8843	GPR109B	0	0	0	1	0.125
cg14162076	chr12	338339	CLEC4D	0	1	1	1	0.125
cg18692273	chr1	7139	TNNT2	0	0	0	1	0.125
cg22484980	chr11	219931	TPCN2	NA	NA	NA	1	0.125
cg03510310	chr11	54979	HRASLS2	0	0	0	1	0.125
cg20953047	chr1	5284	PIGR	0	1	0	1	0.125
cg18705776	chr10	810	CALML3	0	0	0	1	0.125
cg15021292	chr5	5295	PIK3R1	0	0	0	1	0.109
cg01871963	chr9	3934	LCN2	0	0	0	1	0.109
cg08458170	chr19	57616	TSHZ3	0	0	0	1	0.109
cg23293787	chr20	8813	DPM1	0	0	0	1	0.109
cg26918728	chr3	7869	SEMA3B	1	0	0	1	0.109
cg17188169	chr6	55510	DDX43	0	0	0	1	0.109
cg06585108	chr10	54777	C10orf92	0	0	0	1	0.109
cg03776850	chr16	23430	TPSD1	0	1	0	1	0.109
cg05766474	chr17	6360	CCL16	0	0	1	1	0.109
cg12510502	chr11	5002	SLC22A18	0	0	0	1	0.109
cg18343862	chr11	10894	LYVE1	0	0	0	1	0.109
cg15648315	chr13	400165	C13orf35	0	0	0	1	0.109
cg12855851	chr6	5225	PGC	0	0	0	1	0.109
cg10889792	chr11	3846	KRTAP5-9	0	0	0	1	0.109
cg15559737	chr22	1413	CRYBA4	0	0	0	1	0.109
cg24019851	chr3	7869	SEMA3B	0	0	0	1	0.109
cg21045388	chr1	23254	RP1-21O18.1	0	0	0	1	0.094
cg21942546	chr7	83451	ABHD11	0	0	0	1	0.094
cg07592353	chr5	2559	GABRA6	0	1	1	1	0.094
cg03534410	chr3	55287	TMEM40	0	1	0	1	0.094
cg14401897	chr19	22904	SBNO2	0	0	0	1	0.094
cg14127336	chr14	8115	TCL1A	0	1	1	1	0.094
cg20015855	chr15	10391	CORO2B	0	1	0	1	0.094
cg18641937	chr1	142683	ITLN2	0	0	1	1	0.094
cg03907174	chr19	57333	RCN3	0	0	0	1	0.094
cg06229674	chr22	164668	APOBEC3H	0	0	0	1	0.094
cg10342590	chr11	740	MRPL49	0	0	0	1	0.094
cg20616836	chr19	166	AES	0	0	0	1	0.094
cg27035806	chr5	51491	NOP16	0	0	0	1	0.094
cg01782486	chr1	51043	ZBTB7B	0	0	0	1	0.094
cg12575181	chr14	5283	PIGH	0	0	0	1	0.094
cg14256699	chr17	50964	SOST	0	0	0	1	0.094
cg05404787	chr2	348738	C2orf48	0	0	0	1	0.094
cg06192619	chr19	6511	SLC1A6	0	0	1	1	0.094
cg10148841	chr11	54538	ROBO4	0	1	0	1	0.094
cg22377428	chr17	350383	GPR142	0	1	1	1	0.094
cg10705251	chr1	257101	ZNF683	0	0	0	1	0.094
cg19700658	chr11	7352	UCP3	0	0	0	1	0.094
cg03658707	chr20	434	ASIP	0	0	0	1	0.078
cg14654385	chr11	83706	FERMT3	0	0	0	1	0.078
cg20089715	chr17	782	CACNB1	0	0	0	1	0.078
cg11617144	chr8	2875	GPT	0	0	0	1	0.078
cg20119871	chr15	57194	ATP10A	0	0	0	1	0.078
cg26709863	chr17	8678	BECN1	NA	NA	NA	1	0.078
cg03558807	chr5	114915	NCRNA00219	0	1	0	1	0.078
cg25813714	chr19	66002	CYP4F12	0	0	1	1	0.078
cg05475904	chr1	8915	BCL10	0	0	0	1	0.078
cg15530356	chr19	84330	ZNF414	0	0	0	1	0.078
cg20748065	chr7	5447	POR	0	0	0	1	0.078
cg25852715	chr11	114879	OSBPL5	0	0	0	1	0.078
cg10037068	chr2	7456	WIPF1	0	1	0	1	0.078
cg13770446	chr1	1187	CLCNKA	0	0	0	1	0.078
cg21690892	chr6	2979	GUCA1B	0	0	0	1	0.078
cg15195353	chr16	84662	GLIS2	0	0	0	1	0.078
cg15028436	chr7	51314	TXNDC3	0	1	1	1	0.078
cg16268563	chr6	534	ATP6V1G2	0	0	0	1	0.078
cg17142134	chr3	6514	SLC2A2	0	0	0	1	0.078
cg26809968	chrX	5956	OPN1LW	0	0	0	1	0.078
cg03327494	chr3	131540	ZDHHC19	0	0	0	1	0.078
cg04127255	chr19	5670	PSG2	0	1	0	1	0.078
cg19869139	chr1	4985	OPRD1	1	0	0	1	0.078
cg03804500	chr9	8636	SSNA1	0	0	0	1	0.062
cg14896003	chr11	8045	RASSF7	0	0	0	1	0.062
cg26136776	chr19	10661	KLF1	0	0	0	1	0.062
cg00668685	chr12	283375	SLC39A5	0	0	0	1	0.062
cg07356189	chrX	1527	TEX28	0	0	0	1	0.062
cg16379513	chr1	81629	TSSK3	0	0	0	1	0.062
cg11512771	chr1	1893	ECM1	0	0	0	1	0.062
cg16017492	chr17	2125	EVPL	0	0	0	1	0.062
cg24053375	chr10	5949	RBP3	0	0	0	1	0.062
cg22647018	chr1	183	AGT	0	0	0	1	0.062
cg06940574	chr1	148645	C1orf211	0	0	0	1	0.062
cg08471713	chr17	4222	MEOX1	0	0	0	1	0.062
cg13735697	chr1	4656	MYOG	0	0	0	1	0.062
cg20751395	chr11	3784	KCNQ1	0	0	0	1	0.062
cg26536164	chr3	83597	RTP3	0	0	0	1	0.062
cg02194211	chr3	131177	FAM3D	0	0	1	1	0.062
cg08402568	chr16	146433	IL34	0	0	0	1	0.062
cg09902130	chr11	923	CD6	0	1	0	1	0.062
cg12485992	chr17	84690	SPATA22	0	1	1	1	0.062
cg17291001	chr14	388007	SERPINA13	0	0	0	1	0.062
cg23566335	chr8	8749	ADAM18	0	1	1	1	0.062
cg01007201	chr12	50856	CLEC4A	0	0	0	1	0.062
cg12529228	chr1	4807	NHLH1	0	0	0	1	0.062
cg12830694	chr19	94274	PPP1R14A	0	0	0	1	0.062
cg14299800	chr9	27348	TOR1B	0	0	0	1	0.062
cg26756862	chr7	1180	CLCN1	0	0	0	1	0.062
cg25955816	chr1	8290	HIST3H3	0	0	0	1	0.062
cg03986640	chr12	4284	MIP	0	0	0	1	0.047
cg15772361	chr18	6317	SERPINB3	0	1	1	1	0.047
cg07851192	chr18	26251	KCNG2	0	0	0	1	0.047
cg01853981	chr12	112802	KRT71	0	1	1	1	0.047
cg13888886	chr20	23626	SPO11	0	1	1	1	0.047
cg16878021	chr14	3500	IGHG1	0	1	1	1	0.047
cg17696091	chr1	6847	SYCP1	NA	NA	NA	1	0.047
cg23753610	chr17	8632	DNAH17	0	0	0	1	0.047
cg00572797	chr1	864	RUNX3	0	0	0	1	0.047
cg06029655	chr19	1954	MEGF8	0	0	0	1	0.047
cg07512345	chr16	7142	TNP2	0	0	0	1	0.047
cg12467090	chr1	5287	PIK3C2B	0	0	0	1	0.047
cg18813928	chr1	864	RUNX3	0	0	0	1	0.047
cg20488657	chr21	7033	TFF3	0	0	0	1	0.047
cg00298357	chr5	27190	IL17B	0	0	0	1	0.047
cg02431687	chr9	203245	NAIF1	0	0	0	1	0.047
cg02883621	chr4	6286	S100P	0	0	0	1	0.047
cg09076584	chr17	124923	FLJ25006	0	0	0	1	0.047
cg11876012	chr16	79622	SNRNP25	0	0	0	1	0.047
cg16540704	chr7	136991	ASZ1	0	0	0	1	0.047
cg26879282	chr11	3784	KCNQ1	0	0	0	1	0.047
cg11132751	chrX	340602	CXorf67	0	1	1	1	0.047
cg24919884	chr1	27237	ARHGEF16	0	0	0	1	0.047
cg19971655	chr1	7809	BSND	1	0	0	1	0.047
cg03568718	chr1	7161	TP73	0	0	0	1	0.047
cg14519000	chr20	140628	GATA5	0	1	0	1	0.047
cg00400263	chr20	63939	C20orf177	1	1	0	1	0.047
cg11784281	chr2	165100	C2orf57	0	0	0	1	0.047
cg18506679	chr9	169611	OLFML2A	0	0	0	1	0.047
cg06650260	chr1	8431	NR0B2	0	0	0	1	0.047
cg25087423	chr11	643	CXCR5	0	0	0	1	0.047
cg02309431	chr20	128859	BPIL3	0	1	1	1	0.047
cg17993949	chr11	116085	SLC22A12	0	0	0	1	0.047
cg14736210	chr20	3745	KCNB1	1	1	1	1	0.047
cg12784172	chr15	146050	ZSCAN29	0	0	0	1	0.047
cg24650229	chr3	152404	IGSF11	0	0	0	1	0.047
cg00344372	chr4	3083	HGFAC	0	0	0	1	0.047
cg27292431	chr6	6580	SLC22A1	0	0	0	1	0.047
cg21226234	chr8	9684	LRRC14	0	0	0	1	0.031
cg26224139	chr9	138162	C9orf116	0	1	0	1	0.031
cg25514503	chr1	8863	PER3	1	0	0	1	0.031
cg11128808	chr19	59285	CACNG6	1	0	0	1	0.031
cg23403256	chr18	4152	MBD1	0	0	0	1	0.031
cg25203980	chr1	116983	ACAP3	0	0	0	1	0.031
cg11476254	chr16	197322	ACSF3	0	0	0	1	0.031
cg18180783	chr10	58529	MYOZ1	0	0	0	1	0.031
cg20627106	chr17	5148	PDE6G	NA	NA	NA	1	0.031
cg21432513	chr12	55743	CHFR	0	0	0	1	0.031
cg02301815	chr17	284058	KIAA1267	0	0	0	1	0.031
cg04618528	chr17	8689	KRT36	0	0	0	1	0.031
cg04970994	chr2	7701	ZNF142	0	0	0	1	0.031
cg05261299	chr12	3164	NR4A1	0	1	0	1	0.031
cg05646865	chr1	200172	SLFNL1	0	0	0	1	0.031
cg08304608	chr20	81027	TUBB1	0	0	0	1	0.031
cg08782122	chr7	346547	FLJ42291	0	1	1	1	0.031
cg09034836	chr22	25812	POM121L1P	0	1	0	1	0.031
cg11254522	chr1	2268	FGR	0	0	0	1	0.031
cg12441964	chr16	283847	CCDC79	0	0	0	1	0.031
cg15296858	chr2	5496	PPM1G	0	0	0	1	0.031
cg15679098	chr11	5913	RAPSN	0	0	0	1	0.031
cg17806989	chr13	56163	RNF17	0	1	1	1	0.031
cg18450227	chr18	5596	MAPK4	0	0	1	1	0.031
cg19257200	chr22	6663	SOX10	0	0	0	1	0.031
cg22552966	chr17	146802	SLC47A2	0	0	0	1	0.031
cg25425005	chr16	3050	HBZ	1	0	0	1	0.031
cg07339327	chr11	595	CCND1	0	0	0	1	0.031
cg05111110	chr11	78999	LRFN4	0	0	0	1	0.031
cg19955257	chr19	400668	PRSSL1	0	1	0	1	0.031
cg01536400	chr9	4702	NDUFA8	0	0	0	1	0.031
cg11828089	chr7	83698	CALN1	0	1	1	1	0.031
cg04523589	chr3	820	CAMP	0	0	0	1	0.031
cg24392574	chr10	51806	CALML5	0	0	0	1	0.031
cg26208930	chr1	7161	TP73	0	0	0	1	0.031
cg08696192	chr17	84951	TNS4	0	0	0	1	0.031
cg15770654	chr1	60672	MIIP	0	0	0	1	0.031
cg18989919	chr3	80111	C3orf36	0	0	0	1	0.031
cg24100167	chr6	154197	PNLDC1	0	0	0	1	0.031
cg01526089	chr17	5023	P2RX1	0	0	0	1	0.031
cg05546038	chr16	8996	NOL3	1	0	0	1	0.031
cg05275605	chr21	378832	NCRNA00175	0	0	0	1	0.031
cg09201719	chr10	1586	CYP17A1	0	0	0	1	0.031
cg14341418	chr6	55937	APOM	0	0	0	1	0.031
cg02039171	chr14	1053	CEBPE	0	0	0	1	0.031
cg06285340	chr15	1583	CYP11A1	0	1	0	1	0.031
cg08424423	chr6	1041	CDSN	0	0	0	1	0.031
cg20994561	chr8	575	BAI1	0	1	1	1	0.031
cg25086957	chrX	139170	DCAF12L1	0	1	1	1	0.031
cg17759354	chr16	6559	SLC12A3	0	0	0	1	0.031
cg10298205	chr8	93100	NAPRT1	0	0	0	1	0.031
cg26372557	chr19	148022	TICAM1	0	0	0	1	0.031
cg02157083	chr11	116519	APOA5	0	0	0	1	0.031
cg11360149	chr5	285659	OR2V2	0	0	1	1	0.031
cg01770400	chr1	462	SERPINC1	0	0	0	1	0.031
cg26427308	chr2	51052	PRLH	0	0	0	1	0.031
cg04366367	chr17	2873	GPS1	0	0	0	1	0.016
cg01587454	chr8	138009	DCAF4L2	0	1	0	1	0.016
cg14014225	chr22	23539	SLC16A8	0	0	0	1	0.016
cg26287988	chr21	574	BAGE	NA	NA	NA	1	0.016
cg03555203	chr19	57616	TSHZ3	0	0	0	1	0.016
cg07824742	chr9	1621	DBH	0	0	0	1	0.016
cg20189782	chr5	408263	C5orf40	0	0	0	1	0.016
cg10645113	chr9	10507	SEMA4D	0	0	0	1	0.016
cg00881370	chr19	55908	LOC55908	0	0	0	1	0.016
cg02044161	chr3	53833	IL20RB	0	0	0	1	0.016
cg15467759	chr5	3340	NDST1	0	0	0	1	0.016
cg16723180	chr11	81532	HCCA2	0	0	0	1	0.016
cg18676764	chr9	25853	DCAF12	0	0	0	1	0.016
cg20972553	chr14	122953	JDP2	0	0	0	1	0.016
cg23919867	chr1	864	RUNX3	0	0	0	1	0.016
cg00344358	chr12	10220	GDF11	0	0	0	1	0.016
cg01076838	chr19	255043	TMEM86B	0	0	0	1	0.016
cg01206970	chr19	8541	PPFIA3	0	0	0	1	0.016
cg01407341	chr15	145946	SPATA8	0	1	1	1	0.016
cg06803253	chr3	2779	GNAT1	0	0	0	1	0.016
cg10530713	chrX	2576	GAGE4	0	0	0	1	0.016
cg13140464	chr15	8120	AP3B2	0	1	1	1	0.016
cg16949889	chr5	373863	DND1	0	0	0	1	0.016
cg19426277	chr7	115330	GPR146	0	0	0	1	0.016
cg21022247	chr12	51411	BIN2	0	0	0	1	0.016
cg23352030	chr20	85441	PRIC285	0	0	0	1	0.016
cg24115627	chr16	80270	HSD3B7	0	0	0	1	0.016
cg26422060	chr11	347853	TBX10	0	0	0	1	0.016
cg27050793	chr19	374897	SBSN	0	1	0	1	0.016
cg01197831	chr9	8789	FBP2	0	0	0	1	0.016
cg06762858	chr7	29992	PILRA	0	0	0	1	0.016
cg06517798	chr1	480	ATP1A4	0	1	0	1	0.016
cg21770617	chr3	131177	FAM3D	0	0	1	1	0.016
cg25092540	chr9	23511	NUP188	0	0	0	1	0.016
cg07634706	chr16	6361	CCL17	NA	NA	NA	1	0.016
cg14356114	chrX	9506	PAGE4	NA	NA	NA	1	0.016
cg11827101	chr2	339789	C2orf46	0	0	0	1	0.016
cg15536230	chr21	54145	H2BFS	0	0	0	1	0.016
cg00412805	chr3	131377	KBTBD5	0	0	0	1	0.016
cg01275830	chr10	79946	C10orf95	0	0	0	1	0.016
cg06288632	chr2	10113	PREB	0	0	0	1	0.016
cg07471052	chr17	1018	CDK3	0	0	0	1	0.016
cg07894717	chr1	1325	CORT	0	0	0	1	0.016
cg08626653	chr7	222950	C7orf51	0	0	0	1	0.016
cg21565972	chr17	284001	CCDC57	0	0	0	1	0.016
cg24912560	chr11	27288	RBMXL2	0	1	1	1	0.016
cg25457027	chr2	5624	PROC	1	0	0	1	0.016
cg26317111	chr1	148581	UBE2U	0	0	0	1	0.016
cg05745457	chr4	84076	TKTL2	0	0	1	1	0.016
cg10059104	chr22	164592	CCDC116	0	0	0	1	0.016
cg13474750	chr22	23616	SH3BP1	0	0	0	1	0.016
cg11110686	chrX	9947	MAGEC1	0	1	1	1	0.016
cg18521925	chr6	85413	SLC22A16	0	0	0	1	0.016
cg01108476	chr6	6954	TCP11	1	0	0	1	0.016
cg14864603	chr17	15	AANAT	0	0	0	1	0.016
cg13270853	chr12	55743	CHFR	0	0	0	1	0.016
cg01095482	chr1	7075	TIE1	0	0	0	1	0.016
cg02706881	chr21	378832	NCRNA00175	0	0	0	1	0.016
cg10055471	chr1	8431	NR0B2	0	0	0	1	0.016
cg11795262	chr19	54815	GATAD2A	0	0	0	1	0.016
cg00686022	chr12	283461	C12orf40	0	1	1	1	0.016
cg17100200	chr1	2981	GUCA2B	0	1	0	1	0.016
cg01708964	chr7	58498	MYL7	0	0	0	1	0.016
cg03113824	chr19	93233	CCDC114	0	0	0	1	0.016
cg15187606	chr1	10158	PDZK1IP1	0	0	1	1	0.016
cg17189778	chrX	554	AVPR2	0	0	0	1	0.016
cg00730260	chr12	144360	C12orf67	0	1	0	1	0.016
cg11998307	chr17	8578	SCARF1	0	0	0	1	0.016
cg07371530	chr16	113000	RPUSD1	0	1	0	1	0.016
cg10221501	chr16	113540	CMTM1	0	0	0	1	0.016
cg10967280	chr12	196477	C12orf12	0	1	0	1	0.016
cg12371177	chr12	55200	PLEKHG6	0	0	0	1	0.016
cg13326338	chr5	64374	SIL1	0	0	0	1	0.016
cg17522601	chr12	55743	CHFR	0	0	0	1	0.016
cg19801560	chr6	8369	HIST1H4G	0	0	0	1	0.016
cg23934633	chr13	140432	RNF113B	0	0	0	1	0.016
cg25828381	chr2	113457	TUBA3D	0	0	0	1	0.016
cg14519134	chr3	132243	H1FOO	0	0	0	1	0.016
cg13156121	chr16	374739	TEPP	0	1	0	1	0.016
cg13247990	chr16	91807	MYLK3	0	0	0	1	0.016
cg21710060	chr13	6011	GRK1	0	0	0	1	0.016
cg22680812	chr15	2038	EPB42	0	1	0	1	0.016
cg24105933	chr4	94031	HTRA3	0	1	0	1	0.016
cg10715231	chr5	11063	SOX30	0	0	0	1	0.016

## Sheet: Ovarian CA
IlmnID	Chromosome	GeneID	Gene Symbol	PCGT	colon-PMD	IMR-PMD	MESC	HypoM-freq(Cancer)
cg03022541	chr3	165721	DNAJB8	0	0	0	1	0.836
cg21578541	chr3	54106	TLR9	0	0	0	1	0.701
cg21898046	chr5	4245	MGAT1	0	0	0	1	0.497
cg12391048	chr16	83886	PRSS27	0	0	0	1	0.486
cg06590610	chr7	10320	IKZF1	0	0	0	1	0.486
cg24423088	chr21	337879	KRTAP8-1	0	1	1	1	0.48
cg06244417	chr9	2219	FCN1	0	0	1	1	0.463
cg25058957	chr19	84839	RAX2	0	0	0	1	0.435
cg14188111	chr1	6284	S100A13	0	0	0	1	0.429
cg20281815	chr8	8000	PSCA	0	1	0	1	0.412
cg04089739	chr19	718	C3	0	0	0	1	0.401
cg18729973	chr21	7031	TFF1	0	0	1	1	0.395
cg01497527	chr15	348094	ANKDD1A	0	0	0	1	0.39
cg00273124	chr5	55651	NHP2	0	0	0	1	0.39
cg16953612	chr3	165721	DNAJB8	0	0	0	1	0.39
cg23878206	chr19	22809	ATF5	0	0	0	1	0.384
cg08687163	chr3	4486	MST1R	0	0	0	1	0.379
cg27291231	chr9	8636	SSNA1	0	0	0	1	0.367
cg13625403	chr11	23650	TRIM29	0	0	1	1	0.362
cg09508556	chr6	170680	PSORS1C2	0	0	0	1	0.345
cg14256699	chr17	50964	SOST	0	0	0	1	0.345
cg15021292	chr5	5295	PIK3R1	0	0	0	1	0.333
cg13118849	chr19	1463	NCAN	0	0	0	1	0.328
cg13994177	chr15	692236	SNORD116@	0	0	0	1	0.311
cg11884243	chr9	2220	FCN2	0	0	0	1	0.311
cg00800095	chrX	29944	PNMA3	0	1	1	1	0.305
cg23834593	chr20	3172	HNF4A	0	0	0	1	0.299
cg25955816	chr1	8290	HIST3H3	0	0	0	1	0.299
cg07592353	chr5	2559	GABRA6	0	1	1	1	0.299
cg18877514	chr12	5827	PXMP2	0	0	0	1	0.294
cg19149785	chr19	11202	KLK8	0	1	1	1	0.294
cg11617144	chr8	2875	GPT	0	0	0	1	0.294
cg10129493	chr19	945	CD33	0	1	1	1	0.288
cg10883352	chr3	5088	PBX2P1	0	0	0	1	0.288
cg27218220	chr9	158135	TTLL11	0	0	0	1	0.288
cg00974864	chr1	2215	FCGR3B	0	1	0	1	0.282
cg05338167	chr15	91860	CALML4	0	0	0	1	0.277
cg20931907	chrX	340602	CXorf67	0	1	1	1	0.277
cg20583073	chr19	8698	S1PR4	0	0	0	1	0.277
cg09864990	chr20	140628	GATA5	0	1	0	1	0.26
cg04499381	chrX	54440	SASH3	0	0	0	1	0.254
cg27610561	chr20	81031	SLC2A10	0	0	0	1	0.254
cg24775607	chr16	6755	SSTR5	0	1	0	1	0.249
cg05942970	chr10	282973	JAKMIP3	0	0	0	1	0.249
cg15639951	chr17	9020	MAP3K14	0	0	0	1	0.249
cg12939547	chr6	80737	C6orf27	0	0	0	1	0.243
cg06650260	chr1	8431	NR0B2	0	0	0	1	0.237
cg10157098	chr7	84691	FAM71F1	0	0	0	1	0.232
cg16777782	chr16	1012	CDH13	0	0	0	1	0.232
cg11340260	chr17	2811	GP1BA	0	0	0	1	0.22
cg10248727	chr9	3933	LCN1	0	1	0	1	0.22
cg26224139	chr9	138162	C9orf116	0	1	0	1	0.22
cg00441136	chr20	9371	KIF3B	0	0	0	1	0.215
cg15379858	chr8	55790	CSGALNACT1	0	0	0	1	0.215
cg08471713	chr17	4222	MEOX1	0	0	0	1	0.215
cg23293787	chr20	8813	DPM1	0	0	0	1	0.209
cg01871963	chr9	3934	LCN2	0	0	0	1	0.203
cg23240895	chr22	55615	PRR5	0	1	0	1	0.203
cg03366382	chr11	3630	INS	0	1	0	1	0.203
cg18140857	chr8	195814	SDR16C5	NA	NA	NA	1	0.203
cg07498879	chr22	5008	OSM	0	0	0	1	0.198
cg20576002	chr12	121355	GTSF1	0	1	0	1	0.198
cg14896003	chr11	8045	RASSF7	0	0	0	1	0.192
cg13833831	chr19	4145	MATK	0	0	0	1	0.192
cg18493147	chr19	284451	ODF3L2	0	0	0	1	0.192
cg00491404	chr1	79574	EPS8L3	0	0	0	1	0.192
cg15657668	chrX	537	ATP6AP1	0	0	0	1	0.181
cg19700658	chr11	7352	UCP3	0	0	0	1	0.181
cg16332224	chr20	8813	DPM1	0	0	0	1	0.181
cg09276978	chr20	22839	DLGAP4	0	1	1	1	0.169
cg17518965	chr19	8698	S1PR4	0	0	0	1	0.169
cg05782292	chr11	6343	SCT	NA	NA	NA	1	0.164
cg13685294	chr3	2912	GRM2	1	0	0	1	0.164
cg08424423	chr6	1041	CDSN	0	0	0	1	0.164
cg17189778	chrX	554	AVPR2	0	0	0	1	0.164
cg18705067	chr7	222183	SRRM3	0	1	0	1	0.158
cg20822628	chr20	140628	GATA5	0	1	0	1	0.158
cg14162076	chr12	338339	CLEC4D	0	1	1	1	0.153
cg19882093	chr20	92086	GGTLC1	0	1	1	1	0.153
cg25115460	chr1	7161	TP73	0	0	0	1	0.153
cg24926042	chr12	3888	KRT82	0	1	0	1	0.153
cg25134071	chr19	11202	KLK8	0	1	1	1	0.153
cg13453139	chr17	23533	PIK3R5	0	1	1	1	0.147
cg15679098	chr11	5913	RAPSN	0	0	0	1	0.147
cg20425130	chr3	89857	KLHL6	0	0	0	1	0.147
cg14014613	chr17	4994	OR3A1	0	0	1	1	0.141
cg16379513	chr1	81629	TSSK3	0	0	0	1	0.141
cg23106779	chrX	1527	TEX28	0	0	0	1	0.141
cg01095482	chr1	7075	TIE1	0	0	0	1	0.141
cg23566335	chr8	8749	ADAM18	0	1	1	1	0.141
cg25813714	chr19	66002	CYP4F12	0	0	1	1	0.141
cg14519350	chr22	5008	OSM	0	0	0	1	0.141
cg04037952	chr2	344561	GPR148	0	0	1	1	0.136
cg13126790	chr6	401281	FLJ27255	0	1	0	1	0.136
cg12815916	chr2	26469	PTPN18	1	0	0	1	0.136
cg06236276	chr6	6582	SLC22A2	0	0	1	1	0.136
cg00668685	chr12	283375	SLC39A5	0	0	0	1	0.136
cg26813458	chr19	4680	CEACAM6	0	0	1	1	0.136
cg01587454	chr8	138009	DCAF4L2	0	1	0	1	0.13
cg13735697	chr1	4656	MYOG	0	0	0	1	0.13
cg25086957	chrX	139170	DCAF12L1	0	1	1	1	0.13
cg12855851	chr6	5225	PGC	0	0	0	1	0.124
cg02643667	chr21	7031	TFF1	0	0	1	1	0.124
cg12858514	chr1	51702	PADI3	0	0	0	1	0.124
cg26738010	chr18	1068	CETN1	0	1	0	1	0.124
cg14127336	chr14	8115	TCL1A	0	1	1	1	0.124
cg03364504	chr1	388666	FLJ36116	0	0	0	1	0.119
cg17188169	chr6	55510	DDX43	0	0	0	1	0.119
cg25514503	chr1	8863	PER3	1	0	0	1	0.119
cg22552966	chr17	146802	SLC47A2	0	0	0	1	0.119
cg20748065	chr7	5447	POR	0	0	0	1	0.119
cg14761227	chr7	1357	CPA1	0	0	0	1	0.119
cg15616400	chr1	284723	SLC25A34	0	0	0	1	0.113
cg08245789	chr22	150350	ENTHD1	0	1	0	1	0.113
cg08696192	chr17	84951	TNS4	0	0	0	1	0.113
cg11128808	chr19	59285	CACNG6	1	0	0	1	0.113
cg02883621	chr4	6286	S100P	0	0	0	1	0.107
cg03510310	chr11	54979	HRASLS2	0	0	0	1	0.107
cg24399405	chr16	8131	C16orf35	NA	NA	NA	1	0.107
cg25551168	chr20	551	AVP	0	0	0	1	0.107
cg07091552	chr11	7352	UCP3	0	0	0	1	0.107
cg02100848	chr3	51066	C3orf32	0	0	0	1	0.107
cg12529228	chr1	4807	NHLH1	0	0	0	1	0.107
cg18524091	chr1	80834	TAS1R2	0	1	1	1	0.107
cg08458170	chr19	57616	TSHZ3	0	0	0	1	0.107
cg20059312	chr2	25791	NGEF	0	0	0	1	0.102
cg00062776	chr19	7288	TULP2	0	0	0	1	0.102
cg09643186	chr14	2877	GPX2	0	0	0	1	0.102
cg05718253	chr19	55908	LOC55908	0	0	0	1	0.102
cg09382492	chr17	15	AANAT	0	0	0	1	0.096
cg13696012	chr20	80341	BPIL1	0	1	1	1	0.096
cg18604842	chr22	164592	CCDC116	0	0	0	1	0.096
cg16017492	chr17	2125	EVPL	0	0	0	1	0.096
cg26149550	chr19	55554	KLK15	0	1	0	1	0.096
cg06192619	chr19	6511	SLC1A6	0	0	1	1	0.096
cg25203980	chr1	116983	ACAP3	0	0	0	1	0.096
cg00563932	chr9	5730	PTGDS	0	0	0	1	0.096
cg07471052	chr17	1018	CDK3	0	0	0	1	0.096
cg12038710	chr8	1015	CDH17	0	0	0	1	0.096
cg09201719	chr10	1586	CYP17A1	0	0	0	1	0.09
cg01108476	chr6	6954	TCP11	1	0	0	1	0.09
cg24613957	chr1	30814	PLA2G2E	0	0	0	1	0.09
cg03534410	chr3	55287	TMEM40	0	1	0	1	0.09
cg27276456	chr19	201516	ZSCAN4	NA	NA	NA	1	0.09
cg05959508	chr1	80342	TRAF3IP3	0	0	0	1	0.09
cg05441133	chr10	2658	GDF2	0	0	0	1	0.085
cg22680812	chr15	2038	EPB42	0	1	0	1	0.085
cg06585108	chr10	54777	C10orf92	0	0	0	1	0.085
cg17142134	chr3	6514	SLC2A2	0	0	0	1	0.085
cg01309153	chr9	6834	SURF1	0	0	0	1	0.079
cg03804500	chr9	8636	SSNA1	0	0	0	1	0.079
cg04523589	chr3	820	CAMP	0	0	0	1	0.079
cg06762858	chr7	29992	PILRA	0	0	0	1	0.079
cg15772361	chr18	6317	SERPINB3	0	1	1	1	0.079
cg07349094	chr2	3899	AFF3	0	1	0	1	0.079
cg18589858	chr11	11309	SLCO2B1	0	1	0	1	0.073
cg20488657	chr21	7033	TFF3	0	0	0	1	0.073
cg01407341	chr15	145946	SPATA8	0	1	1	1	0.073
cg15296858	chr2	5496	PPM1G	0	0	0	1	0.073
cg00344372	chr4	3083	HGFAC	0	0	0	1	0.073
cg03243506	chr20	117532	TMC2	0	0	0	1	0.073
cg08351331	chr20	3929	LBP	0	1	0	1	0.073
cg19056418	chr17	147138	TMC8	1	0	0	1	0.073
cg07008350	chr18	162699	TCEB3C	0	0	0	1	0.068
cg13247990	chr16	91807	MYLK3	0	0	0	1	0.068
cg02157083	chr11	116519	APOA5	0	0	0	1	0.068
cg15648315	chr13	400165	C13orf35	0	0	0	1	0.068
cg10148841	chr11	54538	ROBO4	0	1	0	1	0.068
cg14401897	chr19	22904	SBNO2	0	0	0	1	0.068
cg02194211	chr3	131177	FAM3D	0	0	1	1	0.068
cg06799664	chr17	8632	DNAH17	0	0	0	1	0.068
cg07851192	chr18	26251	KCNG2	0	0	0	1	0.068
cg18692273	chr1	7139	TNNT2	0	0	0	1	0.068
cg22789545	chr20	92747	C20orf114	0	1	1	1	0.062
cg10055471	chr1	8431	NR0B2	0	0	0	1	0.062
cg03842617	chr7	4846	NOS3	0	0	0	1	0.062
cg04697562	chr7	221914	GPC2	1	0	0	1	0.062
cg15028436	chr7	51314	TXNDC3	0	1	1	1	0.062
cg24650229	chr3	152404	IGSF11	0	0	0	1	0.062
cg24697329	chr2	50649	ARHGEF4	0	1	1	1	0.062
cg08402568	chr16	146433	IL34	0	0	0	1	0.062
cg11828089	chr7	83698	CALN1	0	1	1	1	0.062
cg25829729	chr13	54937	SOHLH2	0	1	0	1	0.062
cg25781162	chr2	64240	ABCG5	0	0	0	1	0.056
cg05261299	chr12	3164	NR4A1	0	1	0	1	0.056
cg03144357	chr8	9684	LRRC14	0	0	0	1	0.056
cg20994561	chr8	575	BAI1	0	1	1	1	0.056
cg08097657	chr3	7869	SEMA3B	0	0	0	1	0.056
cg26756862	chr7	1180	CLCN1	0	0	0	1	0.056
cg20089715	chr17	782	CACNB1	0	0	0	1	0.056
cg02449608	chr19	147685	C19orf18	0	0	0	1	0.056
cg14014225	chr22	23539	SLC16A8	0	0	0	1	0.051
cg12575181	chr14	5283	PIGH	0	0	0	1	0.051
cg03907174	chr19	57333	RCN3	0	0	0	1	0.051
cg10062065	chr2	10290	SPEG	0	1	0	1	0.051
cg03483654	chr11	26007	DAK	0	0	0	1	0.051
cg19869139	chr1	4985	OPRD1	1	0	0	1	0.051
cg16542081	chr20	140628	GATA5	0	1	0	1	0.051
cg08626653	chr7	222950	C7orf51	0	0	0	1	0.051
cg14654385	chr11	83706	FERMT3	0	0	0	1	0.051
cg01197831	chr9	8789	FBP2	0	0	0	1	0.051
cg10673431	chr1	6282	S100A11	0	1	0	1	0.045
cg22377428	chr17	350383	GPR142	0	1	1	1	0.045
cg01007201	chr12	50856	CLEC4A	0	0	0	1	0.045
cg01770400	chr1	462	SERPINC1	0	0	0	1	0.045
cg21522797	chr16	5336	PLCG2	0	1	0	1	0.045
cg21770617	chr3	131177	FAM3D	0	0	1	1	0.045
cg02701137	chr20	22839	DLGAP4	0	1	1	1	0.045
cg18180783	chr10	58529	MYOZ1	0	0	0	1	0.045
cg12428416	chr13	2700	GJA3	0	0	0	1	0.045
cg03568718	chr1	7161	TP73	0	0	0	1	0.045
cg16825643	chr16	9780	FAM38A	0	0	0	1	0.045
cg03658707	chr20	434	ASIP	0	0	0	1	0.04
cg14299800	chr9	27348	TOR1B	0	0	0	1	0.04
cg02431687	chr9	203245	NAIF1	0	0	0	1	0.04
cg02582754	chr6	4142	MAS1	0	0	0	1	0.04
cg11110686	chrX	9947	MAGEC1	0	1	1	1	0.04
cg05766474	chr17	6360	CCL16	0	0	1	1	0.04
cg04898512	chr19	10365	KLF2	1	0	0	1	0.04
cg11834681	chr19	1553	CYP2A13	0	0	1	1	0.04
cg25612145	chr7	56164	STK31	0	0	0	1	0.04
cg03776850	chr16	23430	TPSD1	0	1	0	1	0.034
cg20953047	chr1	5284	PIGR	0	1	0	1	0.034
cg12784172	chr15	146050	ZSCAN29	0	0	0	1	0.034
cg05275605	chr21	378832	NCRNA00175	0	0	0	1	0.034
cg13156121	chr16	374739	TEPP	0	1	0	1	0.034
cg00686022	chr12	283461	C12orf40	0	1	1	1	0.034
cg01526089	chr17	5023	P2RX1	0	0	0	1	0.034
cg04127255	chr19	5670	PSG2	0	1	0	1	0.034
cg04300115	chr20	85441	PRIC285	0	0	0	1	0.034
cg08948050	chr5	113829	SLC35A4	0	0	0	1	0.034
cg06285340	chr15	1583	CYP11A1	0	1	0	1	0.034
cg07440877	chr13	400110	FLJ46358	0	0	0	1	0.034
cg09902130	chr11	923	CD6	0	1	0	1	0.034
cg24019851	chr3	7869	SEMA3B	0	0	0	1	0.034
cg09614401	chr20	146	ADRA1D	1	0	0	1	0.034
cg16268563	chr6	534	ATP6V1G2	0	0	0	1	0.034
cg17696091	chr1	6847	SYCP1	NA	NA	NA	1	0.034
cg03558807	chr5	114915	NCRNA00219	0	1	0	1	0.034
cg26809968	chrX	5956	OPN1LW	0	0	0	1	0.034
cg07634706	chr16	6361	CCL17	NA	NA	NA	1	0.028
cg05910970	chr19	1548	CYP2A6	0	0	0	1	0.028
cg02706881	chr21	378832	NCRNA00175	0	0	0	1	0.028
cg01536400	chr9	4702	NDUFA8	0	0	0	1	0.028
cg01782486	chr1	51043	ZBTB7B	0	0	0	1	0.028
cg04511195	chr19	51343	FZR1	0	0	0	1	0.028
cg10037068	chr2	7456	WIPF1	0	1	0	1	0.028
cg11767711	chr19	333	APLP1	1	1	0	1	0.028
cg17993949	chr11	116085	SLC22A12	0	0	0	1	0.028
cg20189782	chr5	408263	C5orf40	0	0	0	1	0.028
cg10705251	chr1	257101	ZNF683	0	0	0	1	0.028
cg26287988	chr21	574	BAGE	NA	NA	NA	1	0.028
cg26536164	chr3	83597	RTP3	0	0	0	1	0.028
cg14736210	chr20	3745	KCNB1	1	1	1	1	0.028
cg07824742	chr9	1621	DBH	0	0	0	1	0.028
cg23401756	chr16	64180	DPEP3	0	0	0	1	0.028
cg19971655	chr1	7809	BSND	1	0	0	1	0.028
cg26427308	chr2	51052	PRLH	0	0	0	1	0.028
cg03986640	chr12	4284	MIP	0	0	0	1	0.028
cg15770654	chr1	60672	MIIP	0	0	0	1	0.028
cg11476254	chr16	197322	ACSF3	0	0	0	1	0.028
cg14519000	chr20	140628	GATA5	0	1	0	1	0.028
cg20119871	chr15	57194	ATP10A	0	0	0	1	0.028
cg15344726	chr13	2700	GJA3	0	0	0	1	0.028
cg00988256	chr19	26526	TSPAN16	0	0	0	1	0.023
cg05475904	chr1	8915	BCL10	0	0	0	1	0.023
cg05546038	chr16	8996	NOL3	1	0	0	1	0.023
cg07894717	chr1	1325	CORT	0	0	0	1	0.023
cg09750183	chr11	5222	PGA5	0	0	0	1	0.023
cg13770446	chr1	1187	CLCNKA	0	0	0	1	0.023
cg15142488	chr19	147719	LYPD4	0	1	1	1	0.023
cg04861271	chr14	8106	PABPN1	0	0	0	1	0.023
cg09076584	chr17	124923	FLJ25006	0	0	0	1	0.023
cg15195353	chr16	84662	GLIS2	0	0	0	1	0.023
cg23403256	chr18	4152	MBD1	0	0	0	1	0.023
cg18450227	chr18	5596	MAPK4	0	0	1	1	0.023
cg24027342	chr11	472	ATM	NA	NA	NA	1	0.023
cg21045388	chr1	23254	RP1-21O18.1	0	0	0	1	0.023
cg11254522	chr1	2268	FGR	0	0	0	1	0.023
cg00623593	chr10	1793	DOCK1	0	0	0	1	0.023
cg17100200	chr1	2981	GUCA2B	0	1	0	1	0.023
cg27035806	chr5	51491	NOP16	0	0	0	1	0.023
cg10645113	chr9	10507	SEMA4D	0	0	0	1	0.023
cg00434413	chrX	8260	ARD1A	0	0	0	1	0.017
cg05384917	chr12	8843	GPR109B	0	0	0	1	0.017
cg05111110	chr11	78999	LRFN4	0	0	0	1	0.017
cg09099177	chr15	91860	CALML4	0	0	0	1	0.017
cg12864581	chr1	79570	NKAIN1	0	0	0	1	0.017
cg14341418	chr6	55937	APOM	0	0	0	1	0.017
cg16408565	chr9	5005	ORM2	0	0	0	1	0.017
cg26208930	chr1	7161	TP73	0	0	0	1	0.017
cg26136776	chr19	10661	KLF1	0	0	0	1	0.017
cg06791867	chr11	90139	TSPAN18	0	1	0	1	0.017
cg09283007	chrX	170062	FAM47B	0	1	0	1	0.017
cg21565972	chr17	284001	CCDC57	0	0	0	1	0.017
cg07339327	chr11	595	CCND1	0	0	0	1	0.017
cg14792155	chr15	123745	PLA2G4E	0	0	0	1	0.017
cg14864603	chr17	15	AANAT	0	0	0	1	0.017
cg15559737	chr22	1413	CRYBA4	0	0	0	1	0.017
cg07356189	chrX	1527	TEX28	0	0	0	1	0.017
cg18641937	chr1	142683	ITLN2	0	0	1	1	0.017
cg18989919	chr3	80111	C3orf36	0	0	0	1	0.017
cg07371530	chr16	113000	RPUSD1	0	1	0	1	0.017
cg03327494	chr3	131540	ZDHHC19	0	0	0	1	0.017
cg22484980	chr11	219931	TPCN2	NA	NA	NA	1	0.017
cg10298205	chr8	93100	NAPRT1	0	0	0	1	0.017
cg08418332	chr9	6363	CCL19	0	1	0	1	0.017
cg24100167	chr6	154197	PNLDC1	0	0	0	1	0.011
cg01206970	chr19	8541	PPFIA3	0	0	0	1	0.011
cg03113824	chr19	93233	CCDC114	0	0	0	1	0.011
cg05646865	chr1	200172	SLFNL1	0	0	0	1	0.011
cg06517798	chr1	480	ATP1A4	0	1	0	1	0.011
cg06940574	chr1	148645	C1orf211	0	0	0	1	0.011
cg07883333	chr1	50848	F11R	0	0	0	1	0.011
cg10221501	chr16	113540	CMTM1	0	0	0	1	0.011
cg11648996	chrX	170062	FAM47B	0	1	0	1	0.011
cg12371177	chr12	55200	PLEKHG6	0	0	0	1	0.011
cg13107169	chr4	55728	N4BP2	NA	NA	NA	1	0.011
cg17759354	chr16	6559	SLC12A3	0	0	0	1	0.011
cg18589624	chr7	11185	INMT	0	0	0	1	0.011
cg19584957	chr1	254173	TTLL10	0	0	0	1	0.011
cg24115627	chr16	80270	HSD3B7	0	0	0	1	0.011
cg24730207	chr9	80142	PTGES2	0	0	0	1	0.011
cg05745457	chr4	84076	TKTL2	0	0	1	1	0.011
cg22290566	chr15	79748	LMAN1L	0	0	0	1	0.011
cg09869858	chr12	8909	P11	0	0	0	1	0.011
cg27292431	chr6	6580	SLC22A1	0	0	0	1	0.011
cg15536230	chr21	54145	H2BFS	0	0	0	1	0.011
cg16480209	chr16	1258	CNGB1	0	1	0	1	0.011
cg20277670	chr5	3274	HRH2	0	1	1	1	0.011
cg06090864	chr19	2864	FFAR1	0	1	1	1	0.011
cg00400263	chr20	63939	C20orf177	1	1	0	1	0.011
cg10059104	chr22	164592	CCDC116	0	0	0	1	0.011
cg24331079	chr2	6775	STAT4	0	0	0	1	0.011
cg24912560	chr11	27288	RBMXL2	0	1	1	1	0.011
cg27108154	chr4	5161	PDHA2	0	1	1	1	0.011
cg12485992	chr17	84690	SPATA22	0	1	1	1	0.011
cg22647018	chr1	183	AGT	0	0	0	1	0.011
cg11512771	chr1	1893	ECM1	0	0	0	1	0.011
cg16723180	chr11	81532	HCCA2	0	0	0	1	0.011
cg00412805	chr3	131377	KBTBD5	0	0	0	1	0.011
cg26918728	chr3	7869	SEMA3B	1	0	0	1	0.011
cg00298357	chr5	27190	IL17B	0	0	0	1	0.011
cg14519134	chr3	132243	H1FOO	0	0	0	1	0.011
cg18705776	chr10	810	CALML3	0	0	0	1	0.011
cg24626923	chr2	10887	PROKR1	0	0	0	1	0.011
cg13270853	chr12	55743	CHFR	0	0	0	1	0.011
cg03555203	chr19	57616	TSHZ3	0	0	0	1	0.011
cg16878021	chr14	3500	IGHG1	0	1	1	1	0.011
cg13888886	chr20	23626	SPO11	0	1	1	1	0.011
cg02803836	chr10	4255	MGMT	0	0	0	1	0.011
cg05404787	chr2	348738	C2orf48	0	0	0	1	0.011
cg11784281	chr2	165100	C2orf57	0	0	0	1	0.011
cg02309431	chr20	128859	BPIL3	0	1	1	1	0.011
cg18521925	chr6	85413	SLC22A16	0	0	0	1	0.011
cg21942546	chr7	83451	ABHD11	0	0	0	1	0.011
cg14079785	chr8	6440	SFTPC	1	0	0	1	0.011
cg24053375	chr10	5949	RBP3	0	0	0	1	0.011
cg24392574	chr10	51806	CALML5	0	0	0	1	0.006
cg01639256	chr2	151516	ASPRV1	0	0	0	1	0.006
cg02148834	chr21	7179	TPTE	0	0	1	1	0.006
cg02401149	chr22	1417	CRYBB3	0	0	1	1	0.006
cg03930970	chr7	55146	ZDHHC4	0	0	0	1	0.006
cg04176254	chr16	181	AGRP	0	0	0	1	0.006
cg04710641	chr6	7936	RDBP	0	0	0	1	0.006
cg06462703	chr12	55743	CHFR	0	0	0	1	0.006
cg10715231	chr5	11063	SOX30	0	0	0	1	0.006
cg11998307	chr17	8578	SCARF1	0	0	0	1	0.006
cg13074965	chr11	10432	RBM14	0	0	0	1	0.006
cg13249256	chr1	84944	MAEL	0	0	1	1	0.006
cg13326338	chr5	64374	SIL1	0	0	0	1	0.006
cg15341760	chr1	148645	C1orf211	0	0	0	1	0.006
cg17561452	chr16	161931	ADAD2	0	0	0	1	0.006
cg18422795	chr20	128497	C20orf165	0	0	0	1	0.006
cg19394737	chr2	255101	CCDC108	0	0	1	1	0.006
cg21130124	chr10	51806	CALML5	0	0	0	1	0.006
cg21378206	chr2	26525	IL1F5	0	0	1	1	0.006
cg23580000	chr16	113	ADCY7	0	0	0	1	0.006
cg25803583	chr17	5345	SERPINF2	0	0	0	1	0.006
cg27573888	chr1	9473	C1orf38	0	0	0	1	0.006
cg11876012	chr16	79622	SNRNP25	0	0	0	1	0.006
cg21226234	chr8	9684	LRRC14	0	0	0	1	0.006
cg14338062	chr12	64333	ARHGAP9	0	0	0	1	0.006
cg08304608	chr20	81027	TUBB1	0	0	0	1	0.006
cg19955257	chr19	400668	PRSSL1	0	1	0	1	0.006
cg04618528	chr17	8689	KRT36	0	0	0	1	0.006
cg11360149	chr5	285659	OR2V2	0	0	1	1	0.006
cg11845202	chr12	196374	KRT78	0	1	0	1	0.006
cg16964535	chr2	285126	DNAJC5G	0	0	0	1	0.006
cg17806989	chr13	56163	RNF17	0	1	1	1	0.006
cg19561774	chr6	6582	SLC22A2	0	0	1	1	0.006
cg02044161	chr3	53833	IL20RB	0	0	0	1	0.006
cg02039171	chr14	1053	CEBPE	0	0	0	1	0.006
cg11827101	chr2	339789	C2orf46	0	0	0	1	0.006
cg18043280	chr17	314	AOC2	0	0	0	1	0.006
cg14975238	chr7	168620	BHLHA15	0	0	0	1	0.006
cg19636871	chr15	92483	LDHAL6B	0	0	0	1	0.006
cg19426277	chr7	115330	GPR146	0	0	0	1	0.006
cg22870280	chr15	10017	BCL2L10	1	0	0	1	0.006
cg00008493	chr14	341947	COX8C	0	1	1	1	0.006
cg17398613	chr21	54020	SLC37A1	0	0	1	1	0.006
cg16249711	chr14	387332	TBPL2	0	0	0	1	0.006
cg26709863	chr17	8678	BECN1	NA	NA	NA	1	0.006
cg08782122	chr7	346547	FLJ42291	0	1	1	1	0.006
cg10207787	chr8	5520	PPP2R2A	0	0	0	1	0.006
cg00730260	chr12	144360	C12orf67	0	1	0	1	0.006
cg06490951	chr18	1068	CETN1	0	1	0	1	0.006
cg21399079	chr2	11250	GPR45	0	0	0	1	0.006
cg00881370	chr19	55908	LOC55908	0	0	0	1	0.006
cg16282679	chr6	80864	EGFL8	0	0	0	1	0.006
cg25181284	chr12	2819	GPD1	0	0	0	1	0.006
cg26422060	chr11	347853	TBX10	0	0	0	1	0.006
cg13847113	chr19	163154	PRR22	0	0	0	1	0.006
cg00344358	chr12	10220	GDF11	0	0	0	1	0.006
cg06803253	chr3	2779	GNAT1	0	0	0	1	0.006
cg21432513	chr12	55743	CHFR	0	0	0	1	0.006
cg13543096	chr16	79153	GDPD3	0	0	0	1	0.006
cg15187606	chr1	10158	PDZK1IP1	0	0	1	1	0.006
cg11132751	chrX	340602	CXorf67	0	1	1	1	0.006
cg10530713	chrX	2576	GAGE4	0	0	0	1	0.006
cg13156411	chr3	5745	PTH1R	0	0	0	1	0.006
cg23352030	chr20	85441	PRIC285	0	0	0	1	0.006
cg25087423	chr11	643	CXCR5	0	0	0	1	0.006

## Sheet: Cervical CA
IlmnID	Chromosome	GeneID	Gene Symbol	PCGT	colon-PMD	IMR-PMD	MESC	HypoM-freq(Cancer)
cg26530341	chr8	8797	TNFRSF10A	0	0	0	1	0.938
cg08368934	chr16	222487	GPR97	0	0	0	1	0.917
cg25612480	chr8	7336	UBE2V2	0	0	0	1	0.875
cg01260219	chr11	11095	ADAMTS8	1	0	0	1	0.833
cg03311899	chr12	338442	GPR109A	0	0	0	1	0.833
cg23606023	chr16	863	CBFA2T3	0	1	0	1	0.833
cg26158194	chr11	4046	LSP1	0	1	0	1	0.833
cg03022541	chr3	165721	DNAJB8	0	0	0	1	0.812
cg03375833	chr3	26140	TTLL3	0	0	0	1	0.812
cg13644052	chr16	124222	PAQR4	0	0	0	1	0.812
cg20828084	chr15	57214	KIAA1199	1	0	0	1	0.812
cg25066857	chr2	10578	GNLY	0	0	0	1	0.812
cg26377677	chr15	5045	FURIN	0	0	0	1	0.812
cg09508556	chr6	170680	PSORS1C2	0	0	0	1	0.792
cg11879188	chr9	28	ABO	1	0	0	1	0.792
cg20583073	chr19	8698	S1PR4	0	0	0	1	0.792
cg03534410	chr3	55287	TMEM40	0	1	0	1	0.771
cg04514469	chr14	161176	C14orf49	0	0	0	1	0.771
cg06643227	chr9	158401	C9orf84	0	0	0	1	0.771
cg15479752	chr19	2867	FFAR2	0	1	1	1	0.771
cg17357062	chr9	2219	FCN1	0	0	1	1	0.771
cg17839611	chr17	2793	GNGT2	0	0	0	1	0.771
cg26111757	chr20	359710	C20orf185	0	1	1	1	0.771
cg12334759	chr19	284451	ODF3L2	0	0	0	1	0.771
cg14481339	chr11	3758	KCNJ1	0	0	0	1	0.771
cg00579402	chr19	2528	FUT6	0	0	0	1	0.75
cg05498681	chr20	6714	SRC	0	0	0	1	0.75
cg14934821	chr9	26086	GPSM1	0	0	0	1	0.75
cg15379858	chr8	55790	CSGALNACT1	0	0	0	1	0.75
cg21578541	chr3	54106	TLR9	0	0	0	1	0.75
cg16953612	chr3	165721	DNAJB8	0	0	0	1	0.75
cg26608199	chr13	2159	F10	0	0	0	1	0.75
cg02679745	chr9	2529	FUT7	0	0	0	1	0.729
cg13520715	chr21	150135	C21orf129	0	0	0	1	0.729
cg19346193	chr10	7390	UROS	0	0	0	1	0.729
cg00136477	chr1	714	C1QC	0	1	0	1	0.708
cg00400263	chr20	63939	C20orf177	1	1	0	1	0.708
cg06244417	chr9	2219	FCN1	0	0	1	1	0.708
cg13745346	chr16	863	CBFA2T3	0	1	0	1	0.708
cg14324675	chr6	7940	LST1	0	0	0	1	0.708
cg03264414	chr9	5047	PAEP	0	1	1	1	0.688
cg05596756	chr12	91523	FAM113B	0	0	0	1	0.688
cg23680518	chr19	374897	SBSN	0	1	0	1	0.688
cg25221254	chr19	125981	ACER1	0	0	0	1	0.688
cg01144251	chr19	284366	KLK9	0	1	1	1	0.667
cg07498879	chr22	5008	OSM	0	0	0	1	0.667
cg11474811	chr11	29850	TRPM5	0	0	0	1	0.667
cg24276491	chr14	55837	EAPP	0	0	0	1	0.667
cg26540515	chr20	51378	ANGPT4	0	1	1	1	0.667
cg26928682	chr6	79865	TREML2	0	1	1	1	0.667
cg02882813	chr20	1473	CST5	0	1	1	1	0.646
cg12869058	chr1	24	ABCA4	0	0	0	1	0.646
cg14757296	chr3	3373	HYAL1	NA	NA	NA	1	0.646
cg12242338	chr3	287015	TRIM42	0	1	1	1	0.646
cg14659547	chr3	84666	RETNLB	0	0	1	1	0.646
cg24824840	chr19	50944	SHANK1	1	1	0	1	0.646
cg01369413	chr11	50613	UBQLN3	0	1	1	1	0.625
cg12531542	chr11	80168	MOGAT2	1	0	0	1	0.625
cg12967560	chr15	145748	LYSMD4	0	0	0	1	0.625
cg15712267	chr19	3337	DNAJB1	0	0	0	1	0.625
cg22122449	chr22	49	ACR	0	0	0	1	0.625
cg23743472	chr11	399967	PATE2	0	1	1	1	0.625
cg26149550	chr19	55554	KLK15	0	1	0	1	0.625
cg27462398	chr1	54680	ZNHIT6	0	0	0	1	0.625
cg20281815	chr8	8000	PSCA	0	1	0	1	0.625
cg24775607	chr16	6755	SSTR5	0	1	0	1	0.625
cg03366382	chr11	3630	INS	0	1	0	1	0.604
cg04415689	chr2	50636	ANO7	0	0	0	1	0.604
cg08477744	chr1	4237	MFAP2	0	0	0	1	0.604
cg14188111	chr1	6284	S100A13	0	0	0	1	0.604
cg14519350	chr22	5008	OSM	0	0	0	1	0.604
cg15743985	chr19	933	CD22	0	1	0	1	0.604
cg25551168	chr20	551	AVP	0	0	0	1	0.604
cg26259865	chr16	124220	ZG16B	0	0	0	1	0.604
cg09643186	chr14	2877	GPX2	0	0	0	1	0.583
cg17502536	chr1	29943	PADI1	0	0	0	1	0.583
cg17647273	chr22	51733	UPB1	1	0	0	1	0.583
cg17676574	chr3	131669	UROC1	0	0	0	1	0.583
cg21122774	chr9	1757	SARDH	0	0	0	1	0.583
cg25903122	chr19	79086	C19orf42	0	0	0	1	0.583
cg26164184	chr9	2220	FCN2	0	0	0	1	0.583
cg26285698	chr16	283897	C16orf54	0	0	0	1	0.583
cg06100324	chr16	10232	MSLN	0	1	0	1	0.583
cg09155025	chr8	55630	SLC39A4	0	0	0	1	0.583
cg16342780	chrX	5365	PLXNB3	0	0	0	1	0.583
cg16379513	chr1	81629	TSSK3	0	0	0	1	0.583
cg24674703	chr11	921	CD5	0	0	0	1	0.583
cg02868123	chr2	5969	REG1P	NA	NA	NA	1	0.583
cg14784653	chr10	222389	BEND7	0	0	0	1	0.583
cg01497527	chr15	348094	ANKDD1A	0	0	0	1	0.562
cg25007250	chr7	4846	NOS3	0	0	0	1	0.562
cg14182690	chr1	864	RUNX3	0	0	0	1	0.562
cg00974864	chr1	2215	FCGR3B	0	1	0	1	0.542
cg03742272	chr17	242	ALOX12B	0	1	0	1	0.542
cg10129493	chr19	945	CD33	0	1	1	1	0.542
cg17918700	chr11	10089	KCNK7	0	0	0	1	0.542
cg02992596	chr4	166863	RBM46	0	1	1	1	0.542
cg09018862	chr19	1954	MEGF8	0	0	0	1	0.542
cg15051063	chr3	5088	PBX2P1	0	0	0	1	0.542
cg22039846	chr19	3802	KIR2DL1	0	0	1	1	0.542
cg04499381	chrX	54440	SASH3	0	0	0	1	0.521
cg07349094	chr2	3899	AFF3	0	1	0	1	0.521
cg08351331	chr20	3929	LBP	0	1	0	1	0.521
cg11061975	chr20	55423	SIRPG	0	1	1	1	0.521
cg12703269	chr15	9051	PSTPIP1	0	0	0	1	0.521
cg17518965	chr19	8698	S1PR4	0	0	0	1	0.521
cg27465569	chr12	83448	PUS7L	0	0	0	1	0.521
cg27504299	chr14	9623	TCL1B	0	1	1	1	0.521
cg00013618	chr22	3535	IGL@	1	1	0	1	0.521
cg02701137	chr20	22839	DLGAP4	0	1	1	1	0.521
cg06255227	chr20	2832	NPBWR2	0	1	0	1	0.521
cg08268099	chr9	10439	OLFM1	0	1	1	1	0.521
cg10645113	chr9	10507	SEMA4D	0	0	0	1	0.521
cg20688340	chr10	118856	MMP21	0	0	0	1	0.521
cg18655915	chr7	5244	ABCB4	NA	NA	NA	1	0.521
cg01669948	chr6	83795	KCNK16	0	1	1	1	0.5
cg06270401	chr12	8798	DYRK4	0	0	0	1	0.5
cg09076077	chr20	284756	C20orf197	0	1	0	1	0.5
cg11827101	chr2	339789	C2orf46	0	0	0	1	0.5
cg14162076	chr12	338339	CLEC4D	0	1	1	1	0.5
cg15075718	chr11	83552	MFRP	0	0	0	1	0.5
cg16017492	chr17	2125	EVPL	0	0	0	1	0.5
cg18729973	chr21	7031	TFF1	0	0	1	1	0.5
cg20792833	chr11	5790	PTPRCAP	0	1	0	1	0.5
cg25514503	chr1	8863	PER3	1	0	0	1	0.5
cg25943276	chr11	399980	C11orf39	0	1	0	1	0.5
cg27412093	chr1	10753	CAPN9	0	0	0	1	0.5
cg20359349	chr17	23591	C17orf88	1	1	0	1	0.5
cg10883352	chr3	5088	PBX2P1	0	0	0	1	0.5
cg00563932	chr9	5730	PTGDS	0	0	0	1	0.479
cg02602411	chr9	5535	PPP3R2	0	0	0	1	0.479
cg05384917	chr12	8843	GPR109B	0	0	0	1	0.479
cg13833831	chr19	4145	MATK	0	0	0	1	0.479
cg02100848	chr3	51066	C3orf32	0	0	0	1	0.479
cg02876062	chr10	83641	FAM107B	0	0	0	1	0.479
cg08321330	chr16	64499	TPSB2	0	1	0	1	0.479
cg00298951	chr12	1240	CMKLR1	0	1	1	1	0.458
cg08097657	chr3	7869	SEMA3B	0	0	0	1	0.458
cg09841009	chr4	2993	GYPA	0	1	1	1	0.458
cg13888886	chr20	23626	SPO11	0	1	1	1	0.458
cg16998872	chr4	2996	GYPE	0	1	0	1	0.458
cg17399166	chr1	912	CD1D	1	1	1	1	0.458
cg26862286	chr2	4691	NCL	0	0	0	1	0.458
cg05338167	chr15	91860	CALML4	0	0	0	1	0.458
cg08539991	chr19	27033	ZBTB32	0	0	0	1	0.458
cg09205751	chr11	171389	NLRP6	0	0	0	1	0.458
cg24950749	chr20	27111	SDCBP2	0	0	0	1	0.458
cg14324838	chr20	2036	EPB41L1	0	0	0	1	0.458
cg14541311	chr14	4624	MYH6	0	0	1	1	0.458
cg00661485	chr5	2299	FOXI1	0	1	1	1	0.438
cg05475277	chr22	80020	FOXRED2	0	0	0	1	0.438
cg07890954	chr15	10002	NR2E3	0	0	0	1	0.438
cg13474750	chr22	23616	SH3BP1	0	0	0	1	0.438
cg15248035	chr9	881	CCIN	0	0	0	1	0.438
cg19685066	chr1	81569	ACTL8	0	1	0	1	0.438
cg22294577	chr7	1811	SLC26A3	NA	NA	NA	1	0.438
cg13259290	chr5	1437	CSF2	0	0	0	1	0.438
cg13681935	chr20	434	ASIP	0	0	0	1	0.438
cg18493147	chr19	284451	ODF3L2	0	0	0	1	0.438
cg03860768	chr8	640	BLK	0	1	0	1	0.438
cg21640749	chr17	146722	CD300LF	0	1	1	1	0.438
cg23566335	chr8	8749	ADAM18	0	1	1	1	0.438
cg24063382	chr6	116511	MAS1L	0	1	1	1	0.438
cg25427638	chr19	1549	CYP2A7	0	0	0	1	0.438
cg11884243	chr9	2220	FCN2	0	0	0	1	0.438
cg05788638	chr14	51156	SERPINA10	0	0	1	1	0.417
cg05959508	chr1	80342	TRAF3IP3	0	0	0	1	0.417
cg11851098	chr22	164684	WBP2NL	0	0	0	1	0.417
cg12815916	chr2	26469	PTPN18	1	0	0	1	0.417
cg13453139	chr17	23533	PIK3R5	0	1	1	1	0.417
cg27336379	chr1	204962	SLC44A5	0	1	1	1	0.417
cg05106502	chr17	8631	SKAP1	1	1	0	1	0.417
cg03818682	chr11	4586	MUC5AC	0	0	0	1	0.417
cg07421682	chr15	5046	PCSK6	0	0	1	1	0.417
cg12718562	chr15	161514	TBC1D21	0	1	0	1	0.417
cg05131835	chr17	2689	GH2	0	1	0	1	0.417
cg20862496	chr8	57152	SLURP1	0	1	0	1	0.417
cg12867448	chr9	4957	ODF2	0	0	0	1	0.417
cg03574571	chr19	933	CD22	0	1	0	1	0.396
cg09358725	chr11	4005	LMO2	0	1	0	1	0.396
cg10134939	chr2	84141	FAM176A	0	0	0	1	0.396
cg10307548	chr4	6649	SOD3	0	0	0	1	0.396
cg11494699	chr11	5896	RAG1	0	1	0	1	0.396
cg13696012	chr20	80341	BPIL1	0	1	1	1	0.396
cg15337006	chr16	3684	ITGAM	0	0	1	1	0.396
cg15821095	chr3	29890	RBM15B	0	0	0	1	0.396
cg22190114	chr19	126205	NLRP8	0	0	1	1	0.396
cg22789545	chr20	92747	C20orf114	0	1	1	1	0.396
cg25634666	chr11	2352	FOLR3	0	0	0	1	0.396
cg27298262	chr16	79007	DBNDD1	0	0	0	1	0.396
cg06899329	chr19	83983	TSSK6	0	0	0	1	0.396
cg09207718	chr15	1544	CYP1A2	0	1	0	1	0.396
cg03842617	chr7	4846	NOS3	0	0	0	1	0.396
cg16413535	chr4	84076	TKTL2	0	0	1	1	0.396
cg22988566	chr20	280664	WFDC10B	0	0	1	1	0.396
cg24423088	chr21	337879	KRTAP8-1	0	1	1	1	0.396
cg16069910	chr19	115861	NXNL1	0	0	0	1	0.396
cg16522484	chr14	161176	C14orf49	0	0	0	1	0.396
cg01309153	chr9	6834	SURF1	0	0	0	1	0.375
cg01962826	chr6	2914	GRM4	0	0	1	1	0.375
cg03843951	chr7	1644	DDC	0	0	0	1	0.375
cg19056418	chr17	147138	TMC8	1	0	0	1	0.375
cg21770145	chr17	5833	PCYT2	0	0	0	1	0.375
cg22193702	chr1	29943	PADI1	0	0	0	1	0.375
cg22415472	chr2	60482	SLC5A7	0	0	1	1	0.375
cg26424956	chr6	2914	GRM4	0	0	1	1	0.375
cg07084709	chr15	145781	GCOM1	1	0	0	1	0.375
cg09422355	chr19	56344	CABP5	0	0	0	1	0.375
cg10377274	chr11	160065	PATE1	0	1	1	1	0.375
cg12071073	chr13	83446	CCDC70	0	0	0	1	0.375
cg00495491	chr12	3709	ITPR2	NA	NA	NA	1	0.375
cg02854090	chr6	221613	HIST1H2AA	0	0	1	1	0.375
cg05190718	chr1	845	CASQ2	0	0	1	1	0.375
cg08684473	chr19	10990	LILRB5	0	1	1	1	0.375
cg14079785	chr8	6440	SFTPC	1	0	0	1	0.375
cg20576002	chr12	121355	GTSF1	0	1	0	1	0.375
cg24172553	chr19	148109	FAM187B	0	0	0	1	0.375
cg10051054	chr1	148870	CCDC27	0	0	0	1	0.375
cg25033144	chr19	90011	KIR3DX1	0	0	1	1	0.375
cg25307641	chr9	6835	SURF2	0	0	0	1	0.375
cg09395732	chr3	6538	SLC6A11	1	1	1	1	0.375
cg00556408	chr22	164656	TMPRSS6	0	1	0	1	0.354
cg09296212	chr9	203245	NAIF1	0	0	0	1	0.354
cg09971811	chr20	8530	CST7	0	0	0	1	0.354
cg11554937	chr9	3293	HSD17B3	0	0	0	1	0.354
cg11600161	chr11	374403	TBC1D10C	0	1	0	1	0.354
cg22381196	chr16	1723	DHODH	0	0	0	1	0.354
cg02374486	chr10	5551	PRF1	0	1	0	1	0.354
cg11068096	chr17	3861	KRT14	0	1	0	1	0.354
cg16529592	chr1	864	RUNX3	0	0	0	1	0.354
cg18129786	chr3	353274	ZNF445	0	0	0	1	0.354
cg20691580	chr11	345	APOC3	0	0	0	1	0.354
cg21522797	chr16	5336	PLCG2	0	1	0	1	0.354
cg12858514	chr1	51702	PADI3	0	0	0	1	0.354
cg13126790	chr6	401281	FLJ27255	0	1	0	1	0.354
cg25020850	chr1	85397	RGS8	0	0	1	1	0.354
cg02982734	chr15	54551	MAGEL2	0	1	1	1	0.354
cg09120035	chr8	1584	CYP11B1	0	1	1	1	0.333
cg10001720	chr1	7805	LAPTM5	0	0	0	1	0.333
cg10719920	chr21	246704	C21orf93	0	1	0	1	0.333
cg17978274	chr15	145858	C15orf32	0	1	1	1	0.333
cg20720686	chr7	5447	POR	0	0	0	1	0.333
cg22870280	chr15	10017	BCL2L10	1	0	0	1	0.333
cg23493704	chrX	8273	SLC10A3	0	0	0	1	0.333
cg25383242	chr16	85445	CNTNAP4	NA	NA	NA	1	0.333
cg26298099	chr14	2103	ESRRB	0	1	1	1	0.333
cg00204262	chr19	1891	ECH1	0	0	0	1	0.333
cg00491404	chr1	79574	EPS8L3	0	0	0	1	0.333
cg00757952	chr22	1414	CRYBB1	0	0	0	1	0.333
cg05684195	chr3	63924	CIDEC	0	0	0	1	0.333
cg11617144	chr8	2875	GPT	0	0	0	1	0.333
cg06353948	chr9	23064	SETX	0	0	0	1	0.333
cg20931907	chrX	340602	CXorf67	0	1	1	1	0.333
cg10624445	chr16	1258	CNGB1	NA	NA	NA	1	0.333
cg10889792	chr11	3846	KRTAP5-9	0	0	0	1	0.333
cg13994177	chr15	692236	SNORD116@	0	0	0	1	0.333
cg27087809	chr15	23205	ACSBG1	0	0	0	1	0.333
cg03716937	chr8	2515	ADAM2	0	1	0	1	0.333
cg04523589	chr3	820	CAMP	0	0	0	1	0.333
cg07446572	chr12	83461	CDCA3	0	0	0	1	0.333
cg18692273	chr1	7139	TNNT2	0	0	0	1	0.333
cg23280807	chr16	115584	SLC5A11	0	0	0	1	0.333
cg25737664	chr20	128646	SIRPD	0	1	1	1	0.333
cg03364504	chr1	388666	FLJ36116	0	0	0	1	0.312
cg08013810	chr20	51230	PHF20	0	0	0	1	0.312
cg09990086	chr8	6867	TACC1	1	0	0	1	0.312
cg11822932	chr11	4005	LMO2	0	1	0	1	0.312
cg14269477	chr7	56302	TRPV5	0	1	1	1	0.312
cg14607011	chr10	282969	C10orf125	0	0	0	1	0.312
cg05564251	chr2	11262	SP140	0	0	0	1	0.312
cg08843314	chrX	2833	CXCR3	0	0	0	1	0.312
cg26757673	chr22	3560	IL2RB	0	1	0	1	0.312
cg03142203	chrX	10149	GPR64	0	1	0	1	0.312
cg23878206	chr19	22809	ATF5	0	0	0	1	0.312
cg24107142	chr2	3099	HK2	0	0	0	1	0.312
cg24392574	chr10	51806	CALML5	0	0	0	1	0.312
cg01408558	chr19	5141	PDE4A	0	0	0	1	0.312
cg03021690	chr14	7127	TNFAIP2	0	0	0	1	0.312
cg21964481	chr9	142680	SLC34A3	0	0	0	1	0.312
cg22013966	chr14	388007	SERPINA13	0	0	0	1	0.312
cg02674804	chr19	92840	REEP6	0	0	0	1	0.312
cg09276978	chr20	22839	DLGAP4	0	1	1	1	0.312
cg16542081	chr20	140628	GATA5	0	1	0	1	0.312
cg12864581	chr1	79570	NKAIN1	0	0	0	1	0.312
cg04697562	chr7	221914	GPC2	1	0	0	1	0.292
cg05766474	chr17	6360	CCL16	0	0	1	1	0.292
cg06791867	chr11	90139	TSPAN18	0	1	0	1	0.292
cg10037068	chr2	7456	WIPF1	0	1	0	1	0.292
cg11487967	chr2	401045	FLJ41327	0	0	0	1	0.292
cg12575181	chr14	5283	PIGH	0	0	0	1	0.292
cg18466173	chr21	246704	C21orf93	0	1	0	1	0.292
cg20649991	chr19	10990	LILRB5	0	1	1	1	0.292
cg23140706	chr12	4778	NFE2	0	0	0	1	0.292
cg03658707	chr20	434	ASIP	0	0	0	1	0.292
cg10057218	chr17	55876	GSDMB	0	0	0	1	0.292
cg10276549	chrX	2564	GABRE	0	0	1	1	0.292
cg13179915	chr11	10089	KCNK7	0	0	0	1	0.292
cg26756862	chr7	1180	CLCN1	0	0	0	1	0.292
cg00453258	chr10	255022	CALHM1	0	0	0	1	0.292
cg26208930	chr1	7161	TP73	0	0	0	1	0.292
cg15670863	chr19	171169	SPACA4	0	0	0	1	0.292
cg16155702	chr19	26291	FGF21	0	0	0	1	0.292
cg01145396	chr2	1146	CHRNG	0	0	0	1	0.292
cg02238504	chr16	23090	ZNF423	0	0	1	1	0.292
cg05484458	chr12	2784	GNB3	0	0	0	1	0.292
cg18091964	chrX	54440	SASH3	0	0	0	1	0.292
cg06285340	chr15	1583	CYP11A1	0	1	0	1	0.292
cg07842062	chr16	4210	MEFV	0	0	0	1	0.292
cg07894717	chr1	1325	CORT	0	0	0	1	0.292
cg11113534	chr20	140683	C20orf70	0	1	1	1	0.292
cg21643045	chr2	6364	CCL20	0	0	0	1	0.292
cg07361385	chr3	197	AHSG	0	0	0	1	0.292
cg19700658	chr11	7352	UCP3	0	0	0	1	0.292
cg00199549	chr22	4174	MCM5	0	0	0	1	0.271
cg07380416	chr11	923	CD6	0	1	0	1	0.271
cg10126923	chr19	4818	NKG7	0	0	0	1	0.271
cg10498097	chr2	375307	C2orf62	0	0	0	1	0.271
cg20340596	chr10	3257	HPS1	0	0	0	1	0.271
cg03362494	chr3	131540	ZDHHC19	0	0	0	1	0.271
cg10322876	chr19	1555	CYP2B6	0	0	1	1	0.271
cg14761227	chr7	1357	CPA1	0	0	0	1	0.271
cg01774645	chr1	257106	ARHGAP30	0	0	0	1	0.271
cg02473123	chr17	924	CD7	0	1	0	1	0.271
cg18877514	chr12	5827	PXMP2	0	0	0	1	0.271
cg19930802	chr15	57194	ATP10A	0	0	0	1	0.271
cg02921257	chr3	165904	XIRP1	0	0	0	1	0.271
cg15657668	chrX	537	ATP6AP1	0	0	0	1	0.271
cg15783800	chr18	115701	ALPK2	0	0	0	1	0.271
cg17983064	chr5	3562	IL3	0	0	0	1	0.271
cg20098478	chr12	11197	WIF1	1	0	0	1	0.271
cg25829729	chr13	54937	SOHLH2	0	1	0	1	0.271
cg04757243	chr3	80111	C3orf36	0	0	0	1	0.271
cg22172494	chr11	283120	H19	0	1	0	1	0.271
cg00512031	chr4	54360	CYTL1	0	1	0	1	0.271
cg05406101	chr21	10069	RWDD2B	0	0	0	1	0.271
cg11024597	chr2	84417	C2orf40	0	0	0	1	0.25
cg18524091	chr1	80834	TAS1R2	0	1	1	1	0.25
cg20782689	chr14	5018	OXA1L	NA	NA	NA	1	0.25
cg24678320	chr19	126375	ZNF792	0	0	0	1	0.25
cg01108476	chr6	6954	TCP11	1	0	0	1	0.25
cg11802013	chr11	595	CCND1	0	0	0	1	0.25
cg21686987	chr16	1504	CTRB1	0	0	0	1	0.25
cg22627427	chr11	745	C11orf9	0	0	0	1	0.25
cg24490338	chr1	7170	TPM3	0	0	0	1	0.25
cg02449608	chr19	147685	C19orf18	0	0	0	1	0.25
cg01442426	chr3	2829	XCR1	0	0	0	1	0.25
cg00943245	chr5	56097	PCDHGC5	0	0	0	1	0.25
cg05826823	chr9	25792	CIZ1	0	0	0	1	0.25
cg06799664	chr17	8632	DNAH17	0	0	0	1	0.25
cg14694011	chr15	1588	CYP19A1	0	0	0	1	0.25
cg16465769	chr6	10864	SLC22A7	0	0	0	1	0.25
cg17539235	chr1	3814	KISS1	0	0	0	1	0.25
cg23234999	chr15	7681	MKRN3	0	1	1	1	0.25
cg26594445	chr11	740	MRPL49	0	0	0	1	0.25
cg00213044	chr12	3853	KRT6A	0	1	1	1	0.25
cg00273124	chr5	55651	NHP2	0	0	0	1	0.25
cg02981853	chr19	23370	ARHGEF18	0	0	0	1	0.25
cg05322019	chr10	57715	SEMA4G	0	1	0	1	0.25
cg19585882	chrX	6756	SSX1	0	0	1	1	0.25
cg23749046	chr1	83873	GPR61	0	0	0	1	0.25
cg26090660	chr4	118425	GDEP	NA	NA	NA	1	0.25
cg21045388	chr1	23254	RP1-21O18.1	0	0	0	1	0.25
cg21731286	chr1	80834	TAS1R2	0	1	1	1	0.25
cg13758677	chrX	2576	GAGE4	0	0	0	1	0.25
cg14321743	chr1	26279	PLA2G2D	0	0	0	1	0.25
cg01909245	chr11	4046	LSP1	0	1	0	1	0.25
cg23776892	chrX	4100	MAGEA1	0	1	1	1	0.25
cg15648315	chr13	400165	C13orf35	0	0	0	1	0.25
cg02082571	chr12	50856	CLEC4A	0	0	0	1	0.229
cg02875404	chr19	57191	VN1R1	0	0	0	1	0.229
cg03886110	chr17	5175	PECAM1	0	0	0	1	0.229
cg09671611	chr16	221188	GPR114	0	0	0	1	0.229
cg14654385	chr11	83706	FERMT3	0	0	0	1	0.229
cg24019851	chr3	7869	SEMA3B	0	0	0	1	0.229
cg12855851	chr6	5225	PGC	0	0	0	1	0.229
cg15021292	chr5	5295	PIK3R1	0	0	0	1	0.229
cg15679098	chr11	5913	RAPSN	0	0	0	1	0.229
cg26681123	chr9	142680	SLC34A3	0	0	0	1	0.229
cg13500819	chr5	51237	MGC29506	0	0	0	1	0.229
cg03993463	chr21	3772	KCNJ15	0	0	0	1	0.229
cg07671208	chr6	11120	BTN2A1	0	0	0	1	0.229
cg13379763	chr2	255101	CCDC108	0	0	1	1	0.229
cg18589858	chr11	11309	SLCO2B1	0	1	0	1	0.229
cg21367957	chr13	2159	F10	0	0	0	1	0.229
cg24926042	chr12	3888	KRT82	0	1	0	1	0.229
cg27592112	chr15	2567	GABRG3	NA	NA	NA	1	0.229
cg06134964	chr3	3697	ITIH1	0	0	0	1	0.229
cg06468695	chr17	146849	CCDC42	0	1	0	1	0.229
cg09847584	chr12	23504	RIMBP2	0	0	1	1	0.229
cg15571154	chr19	148109	FAM187B	0	0	0	1	0.229
cg24287460	chr3	79825	CCDC48	0	0	0	1	0.229
cg23174481	chr19	374877	C19orf45	0	0	0	1	0.229
cg26813458	chr19	4680	CEACAM6	0	0	1	1	0.229
cg11608424	chr7	253012	HEPACAM2	0	0	0	1	0.229
cg07506795	chr16	7567	ZNF19	0	0	0	1	0.208
cg07830847	chr1	3744	KCNA10	0	0	1	1	0.208
cg10673431	chr1	6282	S100A11	0	1	0	1	0.208
cg11283860	chr1	50651	SLC45A1	0	0	0	1	0.208
cg11466485	chr9	1757	SARDH	0	0	0	1	0.208
cg18140857	chr8	195814	SDR16C5	NA	NA	NA	1	0.208
cg22068211	chr3	23434	C3orf27	0	0	0	1	0.208
cg25455753	chr15	145858	C15orf32	0	1	1	1	0.208
cg26427308	chr2	51052	PRLH	0	0	0	1	0.208
cg00668685	chr12	283375	SLC39A5	0	0	0	1	0.208
cg08315277	chr22	10343	PKDREJ	1	0	0	1	0.208
cg09451092	chr1	25790	CCDC19	0	0	0	1	0.208
cg20089715	chr17	782	CACNB1	0	0	0	1	0.208
cg26918728	chr3	7869	SEMA3B	1	0	0	1	0.208
cg11834681	chr19	1553	CYP2A13	0	0	1	1	0.208
cg16507522	chr14	12	SERPINA3	0	0	0	1	0.208
cg17250929	chr1	6276	S100A5	0	0	0	1	0.208
cg00314943	chr2	251	ALPPL2	0	0	0	1	0.208
cg04825431	chr10	8187	ZNF239	0	0	0	1	0.208
cg06084117	chr7	91584	PLXNA4	0	1	1	1	0.208
cg08579995	chr19	DISCONTUNUED	DISCONTUNUED	0	0	0	1	0.208
cg09528351	chr17	23533	PIK3R5	0	1	1	1	0.208
cg11128808	chr19	59285	CACNG6	1	0	0	1	0.208
cg13770446	chr1	1187	CLCNKA	0	0	0	1	0.208
cg18152830	chr17	23495	TNFRSF13B	0	0	0	1	0.208
cg18986165	chr19	89858	SIGLEC12	0	1	1	1	0.208
cg22294908	chr20	23051	ZHX3	0	0	0	1	0.208
cg24150528	chr5	DISCONTUNUED	DISCONTUNUED	0	0	0	1	0.208
cg27050793	chr19	374897	SBSN	0	1	0	1	0.208
cg10516359	chr11	55343	SLC35C1	0	0	0	1	0.208
cg14519000	chr20	140628	GATA5	0	1	0	1	0.208
cg16194715	chr13	4093	SMAD9	0	0	0	1	0.208
cg24580001	chr11	283234	CCDC88B	0	0	0	1	0.208
cg14615807	chr1	7809	BSND	1	0	0	1	0.208
cg13726507	chrX	30848	CTAG2	0	0	0	1	0.208
cg06189133	chr19	3640	INSL3	0	0	0	1	0.208
cg14297029	chr22	6753	SSTR3	0	1	0	1	0.208
cg05242523	chr19	43847	KLK14	0	1	0	1	0.208
cg26473272	chr11	90019	SYT8	0	1	0	1	0.188
cg11964474	chr17	672	BRCA1	0	0	0	1	0.188
cg23717696	chrX	26548	ITGB1BP2	0	0	0	1	0.188
cg26750747	chr11	2348	FOLR1	0	0	0	1	0.188
cg01567482	chr5	10636	RGS14	0	0	0	1	0.188
cg04300115	chr20	85441	PRIC285	0	0	0	1	0.188
cg11099899	chr21	23562	CLDN14	0	0	0	1	0.188
cg13675849	chr7	56302	TRPV5	0	1	1	1	0.188
cg13985639	chr10	112817	DHDPSL	0	0	0	1	0.188
cg14127336	chr14	8115	TCL1A	0	1	1	1	0.188
cg25071429	chrX	56156	TEX13B	0	1	1	1	0.188
cg26292028	chr12	283446	MYO1H	0	0	0	1	0.188
cg27412902	chr19	282618	IL29	0	1	0	1	0.188
cg01255591	chr20	140902	R3HDML	0	0	0	1	0.188
cg07882535	chr11	29850	TRPM5	0	0	0	1	0.188
cg14963897	chr20	9054	NFS1	0	0	0	1	0.188
cg07440877	chr13	400110	FLJ46358	0	0	0	1	0.188
cg15777570	chr9	10850	CCL27	0	0	0	1	0.188
cg21209356	chr22	1439	CSF2RB	0	1	1	1	0.188
cg01459162	chr1	51702	PADI3	0	0	0	1	0.188
cg08772206	chr10	387694	SH2D4B	0	0	0	1	0.188
cg18242139	chr1	1996	ELAVL4	0	1	1	1	0.188
cg09914304	chr10	5551	PRF1	0	1	0	1	0.188
cg13656062	chr19	8529	CYP4F2	0	0	1	1	0.188
cg15459773	chr1	83932	C1orf124	0	0	0	1	0.188
cg04636194	chrX	9506	PAGE4	0	1	1	1	0.188
cg13735697	chr1	4656	MYOG	0	0	0	1	0.188
cg17264470	chr19	26291	FGF21	0	0	0	1	0.188
cg26718585	chr2	5624	PROC	0	0	0	1	0.188
cg00433406	chr1	127731	VWA5B1	0	0	0	1	0.188
cg08433095	chr15	161582	DYX1C1	0	1	0	1	0.188
cg07592353	chr5	2559	GABRA6	0	1	1	1	0.188
cg02431687	chr9	203245	NAIF1	0	0	0	1	0.188
cg08201421	chr20	7125	TNNC2	0	0	0	1	0.188
cg21230133	chr17	3881	KRT31	0	1	0	1	0.188
cg03801286	chr21	3753	KCNE1	0	0	0	1	0.167
cg15352829	chr14	122618	PLD4	0	0	0	1	0.167
cg19257200	chr22	6663	SOX10	0	0	0	1	0.167
cg20748065	chr7	5447	POR	0	0	0	1	0.167
cg22325715	chr17	124817	CNTD1	0	0	0	1	0.167
cg23272214	chr21	54039	PCBP3	0	1	0	1	0.167
cg26790059	chr5	408263	C5orf40	0	0	0	1	0.167
cg12643877	chr17	201176	ARHGAP27	0	0	0	1	0.167
cg01169610	chr2	3631	INPP4A	0	0	0	1	0.167
cg06479512	chr6	154197	PNLDC1	0	0	0	1	0.167
cg10715231	chr5	11063	SOX30	0	0	0	1	0.167
cg13118849	chr19	1463	NCAN	0	0	0	1	0.167
cg24399405	chr16	8131	C16orf35	NA	NA	NA	1	0.167
cg25283297	chr20	2778	GNAS	1	1	0	1	0.167
cg26491484	chr9	10319	LAMC3	0	1	0	1	0.167
cg09434995	chr7	136853	SRCRB4D	0	0	0	1	0.167
cg11346450	chr2	54659	UGT1A3	0	0	0	1	0.167
cg11767711	chr19	333	APLP1	1	1	0	1	0.167
cg14078518	chr4	2712	GK2	0	1	0	1	0.167
cg15028436	chr7	51314	TXNDC3	0	1	1	1	0.167
cg16280667	chr11	643	CXCR5	0	0	0	1	0.167
cg16581199	chr5	83942	TSSK1B	0	1	0	1	0.167
cg17291001	chr14	388007	SERPINA13	0	0	0	1	0.167
cg20016416	chr11	6712	SPTBN2	0	0	0	1	0.167
cg20985014	chr6	8838	WISP3	0	1	0	1	0.167
cg25995460	chr1	712	C1QA	0	1	0	1	0.167
cg20573420	chr19	126375	ZNF792	0	0	0	1	0.167
cg26934034	chr12	113675	SDSL	0	0	0	1	0.167
cg27394486	chr15	23742	C15orf2	0	1	1	1	0.167
cg02377083	chr3	1238	CCBP2	NA	NA	NA	1	0.167
cg24517042	chr3	859	CAV3	0	1	0	1	0.167
cg27218220	chr9	158135	TTLL11	0	0	0	1	0.167
cg01731341	chr12	2251	FGF6	0	0	1	1	0.167
cg17941312	chr20	9837	GINS1	NA	NA	NA	1	0.167
cg06094150	chr16	4490	MT1B	0	1	0	1	0.167
cg21349901	chr7	64006	ERVK6	NA	NA	NA	1	0.167
cg12493160	chr9	5568	PRKACG	0	0	1	1	0.167
cg01770400	chr1	462	SERPINC1	0	0	0	1	0.167
cg19812619	chr12	3695	ITGB7	0	0	0	1	0.167
cg27465849	chr10	55301	OLAH	0	0	0	1	0.167
cg14264994	chr20	140690	CTCFL	0	0	0	1	0.167
cg21370143	chr11	4607	MYBPC3	0	0	0	1	0.167
cg00344709	chr21	317754	POTED	0	1	1	1	0.167
cg17001430	chr6	3834	KIF25	0	0	0	1	0.167
cg11667117	chr16	763	CA5A	0	0	0	1	0.167
cg23282949	chrX	5973	RENBP	0	0	0	1	0.167
cg26738010	chr18	1068	CETN1	0	1	0	1	0.167
cg09190408	chr11	374403	TBC1D10C	0	1	0	1	0.146
cg09303642	chr12	4778	NFE2	0	0	0	1	0.146
cg09902130	chr11	923	CD6	0	1	0	1	0.146
cg02194211	chr3	131177	FAM3D	0	0	1	1	0.146
cg20488657	chr21	7033	TFF3	0	0	0	1	0.146
cg17469479	chr12	283420	CLEC9A	0	1	0	1	0.146
cg09701102	chr11	4723	NDUFV1	0	0	0	1	0.146
cg02309431	chr20	128859	BPIL3	0	1	1	1	0.146
cg03044435	chr4	401114	FLJ35816	0	0	0	1	0.146
cg04569804	chr5	1436	CSF1R	0	0	0	1	0.146
cg06236276	chr6	6582	SLC22A2	0	0	1	1	0.146
cg16358738	chr2	189	AGXT	0	0	0	1	0.146
cg24995381	chr7	353345	GPR141	0	1	1	1	0.146
cg01053621	chr1	336	APOA2	0	0	0	1	0.146
cg19465374	chr7	563	AZGP1	0	0	0	1	0.146
cg20119871	chr15	57194	ATP10A	0	0	0	1	0.146
cg23609672	chr1	4608	MYBPH	0	0	0	1	0.146
cg25889160	chr14	5104	SERPINA5	0	0	1	1	0.146
cg26015133	chr1	127943	FCRLB	0	0	0	1	0.146
cg26809968	chrX	5956	OPN1LW	0	0	0	1	0.146
cg15195353	chr16	84662	GLIS2	0	0	0	1	0.146
cg13386884	chr11	81490	PTDSS2	0	0	0	1	0.146
cg13145013	chr11	283120	H19	0	1	0	1	0.146
cg02044879	chr10	84647	PLA2G12B	0	0	0	1	0.146
cg07297178	chr19	1087	CEACAM7	0	0	1	1	0.146
cg08424423	chr6	1041	CDSN	0	0	0	1	0.146
cg11811840	chr2	54658	UGT1A1	0	0	0	1	0.146
cg23144899	chr2	1420	CRYGC	0	0	0	1	0.146
cg15001372	chr7	2645	GCK	0	0	0	1	0.146
cg01827098	chr7	168537	GIMAP7	0	1	1	1	0.146
cg07123548	chr19	147746	HIPK4	0	0	0	1	0.146
cg09447105	chr12	5149	PDE6H	0	0	0	1	0.146
cg11221132	chr22	1564	CYP2D7P1	0	0	0	1	0.146
cg18432384	chr11	220004	C11orf66	0	0	0	1	0.146
cg22022041	chr3	10803	CCR9	0	0	0	1	0.146
cg03804500	chr9	8636	SSNA1	0	0	0	1	0.146
cg05275605	chr21	378832	NCRNA00175	0	0	0	1	0.146
cg12491710	chr19	3982	LIM2	0	0	0	1	0.146
cg14358743	chr13	2621	GAS6	0	0	0	1	0.146
cg14864603	chr17	15	AANAT	0	0	0	1	0.146
cg25229964	chr1	10256	CNKSR1	0	0	0	1	0.146
cg19160878	chr2	9330	GTF3C3	0	0	0	1	0.146
cg25134071	chr19	11202	KLK8	0	1	1	1	0.146
cg03754063	chr19	9817	KEAP1	0	0	0	1	0.146
cg03986640	chr12	4284	MIP	0	0	0	1	0.146
cg18604842	chr22	164592	CCDC116	0	0	0	1	0.146
cg24027679	chr1	155184	SLC2A7	0	0	0	1	0.146
cg25934198	chr9	401563	C9orf139	0	0	0	1	0.146
cg10148841	chr11	54538	ROBO4	0	1	0	1	0.125
cg17894008	chr17	342538	NACA2	0	1	0	1	0.125
cg27318281	chr18	125476	INO80C	0	0	0	1	0.125
cg14893129	chr17	79092	CARD14	0	0	0	1	0.125
cg24100167	chr6	154197	PNLDC1	0	0	0	1	0.125
cg25061755	chr2	11037	STON1	0	1	0	1	0.125
cg18557145	chr9	971	CD72	0	0	0	1	0.125
cg22495124	chr17	27091	CACNG5	0	1	0	1	0.125
cg24443136	chrX	492	ATP2B3	0	0	0	1	0.125
cg25306170	chr13	122011	CSNK1A1L	0	1	0	1	0.125
cg26099316	chr3	3699	ITIH3	0	0	0	1	0.125
cg27246571	chr12	3034	HAL	0	0	0	1	0.125
cg02432101	chr18	162699	TCEB3C	0	0	0	1	0.125
cg05546038	chr16	8996	NOL3	1	0	0	1	0.125
cg19642007	chr11	7140	TNNT3	0	1	0	1	0.125
cg24800887	chr16	2175	FANCA	0	0	0	1	0.125
cg04816348	chr19	339390	CLEC4G	1	1	0	1	0.125
cg03327494	chr3	131540	ZDHHC19	0	0	0	1	0.125
cg06585108	chr10	54777	C10orf92	0	0	0	1	0.125
cg10333959	chr10	4255	MGMT	0	0	0	1	0.125
cg18450227	chr18	5596	MAPK4	0	0	1	1	0.125
cg26136776	chr19	10661	KLF1	0	0	0	1	0.125
cg06910100	chr19	83878	USHBP1	0	0	0	1	0.125
cg22182975	chr6	2853	GPR31	0	0	1	1	0.125
cg16989248	chr7	908	CCT6A	0	0	0	1	0.125
cg20376767	chr19	114335	CGB1	0	0	0	1	0.125
cg01536400	chr9	4702	NDUFA8	0	0	0	1	0.125
cg13782134	chr16	123904	NRN1L	0	0	0	1	0.125
cg15532088	chr17	256957	C17orf66	0	0	0	1	0.125
cg18521925	chr6	85413	SLC22A16	0	0	0	1	0.125
cg27117399	chr18	84735	CNDP1	0	0	0	1	0.125
cg21277505	chr19	284361	C19orf63	0	0	0	1	0.125
cg24027342	chr11	472	ATM	NA	NA	NA	1	0.125
cg16204289	chr2	84141	FAM176A	0	0	0	1	0.125
cg23773532	chr12	55507	GPRC5D	0	0	0	1	0.125
cg18368125	chr16	146456	TMED6	0	0	0	1	0.104
cg20059312	chr2	25791	NGEF	0	0	0	1	0.104
cg02664205	chr6	27115	PDE7B	0	1	0	1	0.104
cg08636224	chr6	2289	FKBP5	0	0	0	1	0.104
cg04109382	chr20	27296	TP53TG5	0	0	0	1	0.104
cg12213910	chr6	135250	RAET1E	0	0	0	1	0.104
cg22692158	chr12	5545	PRB4	0	1	1	1	0.104
cg25833031	chr10	55149	MTPAP	0	0	0	1	0.104
cg01007201	chr12	50856	CLEC4A	0	0	0	1	0.104
cg17696091	chr1	6847	SYCP1	NA	NA	NA	1	0.104
cg22445920	chr5	285641	SLC36A3	0	1	1	1	0.104
cg27596068	chr11	871	SERPINH1	0	0	0	1	0.104
cg03568718	chr1	7161	TP73	0	0	0	1	0.104
cg09118625	chr1	9077	DIRAS3	0	0	0	1	0.104
cg23696712	chr12	338785	KRT79	0	1	0	1	0.104
cg07911673	chr17	399512	SLC25A35	0	0	0	1	0.104
cg25058957	chr19	84839	RAX2	0	0	0	1	0.104
cg25087423	chr11	643	CXCR5	0	0	0	1	0.104
cg09542291	chr1	4184	SMCP	0	1	1	1	0.104
cg14238120	chr1	10136	CELA3A	0	0	0	1	0.104
cg22377428	chr17	350383	GPR142	0	1	1	1	0.104
cg25013838	chr22	84700	MYO18B	0	0	0	1	0.104
cg05348870	chr19	8740	TNFSF14	0	0	0	1	0.104
cg08430598	chr20	1469	CST1	0	1	1	1	0.104
cg08471713	chr17	4222	MEOX1	0	0	0	1	0.104
cg12811135	chr2	200523	C2orf51	0	1	1	1	0.104
cg13449372	chr10	84545	MRPL43	0	1	0	1	0.104
cg22152667	chr7	4951	OCM2	0	0	0	1	0.104
cg27212977	chr8	1671	DEFA6	0	0	1	1	0.104
cg05922591	chr19	11006	LILRB4	0	0	1	1	0.104
cg07531356	chr9	11172	INSL6	0	1	0	1	0.104
cg16159313	chr3	95	ACY1	0	0	0	1	0.104
cg16777782	chr16	1012	CDH13	0	0	0	1	0.104
cg27387222	chr12	10059	DNM1L	0	0	0	1	0.104
cg06711560	chr9	158056	MAMDC4	0	0	0	1	0.104
cg14467840	chr1	6271	S100A1	0	0	0	1	0.104
cg13550608	chr3	7869	SEMA3B	0	0	0	1	0.104
cg00945862	chr2	57835	SLC4A5	0	0	0	1	0.104
cg02540157	chr7	79037	PVRIG	0	0	0	1	0.104
cg03271907	chr10	4255	MGMT	0	0	0	1	0.104
cg04256470	chr1	1325	CORT	0	0	0	1	0.104
cg08137716	chr17	284076	TTLL6	0	0	0	1	0.104
cg08936952	chr14	399671	HEATR4	0	0	0	1	0.104
cg10408410	chr15	6017	RLBP1	0	0	0	1	0.104
cg11212312	chr5	3562	IL3	0	0	0	1	0.104
cg11784281	chr2	165100	C2orf57	0	0	0	1	0.104
cg11898695	chr6	171558	PTCRA	0	0	0	1	0.104
cg16128363	chr18	9229	DLGAP1	0	1	0	1	0.104
cg21358381	chr17	5539	PPY	0	1	0	1	0.104
cg22647018	chr1	183	AGT	0	0	0	1	0.104
cg25729716	chr17	974	CD79B	0	0	0	1	0.104
cg05887405	chr16	29948	OSGIN1	0	0	0	1	0.104
cg14150666	chr2	3579	CXCR2	0	1	0	1	0.104
cg15764655	chr22	6305	SBF1	0	0	0	1	0.104
cg23036025	chr19	10998	SLC27A5	0	0	0	1	0.104
cg25813714	chr19	66002	CYP4F12	0	0	1	1	0.104
cg07824742	chr9	1621	DBH	0	0	0	1	0.104
cg08124722	chr17	6354	CCL7	0	1	0	1	0.104
cg14784348	chrX	3054	HCFC1	0	0	0	1	0.104
cg09966445	chr7	273	AMPH	1	1	0	1	0.104
cg05404787	chr2	348738	C2orf48	0	0	0	1	0.083
cg17188169	chr6	55510	DDX43	0	0	0	1	0.083
cg26751195	chr16	6693	SPN	0	0	0	1	0.083
cg00344372	chr4	3083	HGFAC	0	0	0	1	0.083
cg16731016	chr19	3960	LGALS4	0	0	0	1	0.083
cg20790540	chr6	171558	PTCRA	0	0	0	1	0.083
cg20543571	chr15	145645	C15orf43	0	0	1	1	0.083
cg16098170	chr19	126306	JSRP1	0	0	0	1	0.083
cg16174071	chr10	244	ANXA8L2	0	0	0	1	0.083
cg18705776	chr10	810	CALML3	0	0	0	1	0.083
cg24457403	chr17	3868	KRT16	0	1	0	1	0.083
cg00800095	chrX	29944	PNMA3	0	1	1	1	0.083
cg06938878	chr11	797	CALCB	1	1	1	1	0.083
cg13605579	chr2	250	ALPP	0	0	0	1	0.083
cg14804557	chr14	2003	ELK2P1	0	1	0	1	0.083
cg16698623	chr10	4255	MGMT	0	0	0	1	0.083
cg17189778	chrX	554	AVPR2	0	0	0	1	0.083
cg20994561	chr8	575	BAI1	0	1	1	1	0.083
cg22917487	chr3	1524	CX3CR1	0	0	1	1	0.083
cg08775793	chr22	8542	APOL1	0	0	0	1	0.083
cg12268344	chr16	5619	PRM1	0	0	0	1	0.083
cg18714560	chr11	6343	SCT	NA	NA	NA	1	0.083
cg04167867	chr3	27136	MORC1	0	0	1	1	0.083
cg16192029	chr7	56311	ANKRD7	0	0	0	1	0.083
cg14014613	chr17	4994	OR3A1	0	0	1	1	0.083
cg15711744	chr12	23519	ANP32D	0	1	1	1	0.083
cg17993949	chr11	116085	SLC22A12	0	0	0	1	0.083
cg19304352	chr8	1669	DEFA4	0	0	1	1	0.083
cg16268563	chr6	534	ATP6V1G2	0	0	0	1	0.083
cg18241647	chr20	128488	WFDC12	0	0	1	1	0.083
cg21958034	chr3	4485	MST1	0	0	0	1	0.083
cg04323365	chrX	2705	GJB1	0	0	0	1	0.083
cg13086467	chr19	84292	MORG1	0	0	0	1	0.083
cg23293787	chr20	8813	DPM1	0	0	0	1	0.083
cg26212229	chr18	6632	SNRPD1	0	0	0	1	0.083
cg12038710	chr8	1015	CDH17	0	0	0	1	0.083
cg15639951	chr17	9020	MAP3K14	0	0	0	1	0.083
cg21432513	chr12	55743	CHFR	0	0	0	1	0.083
cg00441136	chr20	9371	KIF3B	0	0	0	1	0.083
cg02751839	chr1	9283	GPR37L1	0	0	0	1	0.083
cg06243393	chr18	84203	TXNDC2	0	0	0	1	0.083
cg11849692	chr10	8861	LDB1	0	0	0	1	0.083
cg13792279	chr21	26285	CLDN17	0	1	1	1	0.083
cg18180783	chr10	58529	MYOZ1	0	0	0	1	0.083
cg23106779	chrX	1527	TEX28	0	0	0	1	0.083
cg06806080	chr3	961	CD47	1	0	0	1	0.083
cg00066153	chr11	56	ACRV1	0	0	0	1	0.083
cg00534856	chr19	1082	CGB	0	0	0	1	0.083
cg00544557	chr21	259234	DSCR10	0	1	0	1	0.083
cg05291178	chr3	115795	C3orf24	0	0	0	1	0.083
cg11132751	chrX	340602	CXorf67	0	1	1	1	0.083
cg18043195	chr9	158297	FAM154A	0	0	0	1	0.083
cg19240938	chr11	5002	SLC22A18	0	0	0	1	0.083
cg21781546	chr2	7701	ZNF142	0	0	0	1	0.083
cg25162301	chr3	197	AHSG	0	0	0	1	0.083
cg10335931	chr11	4607	MYBPC3	0	0	0	1	0.083
cg11258532	chr16	766	CA7	1	0	0	1	0.083
cg14448104	chr20	8785	MATN4	0	0	0	1	0.083
cg14975238	chr7	168620	BHLHA15	0	0	0	1	0.083
cg22458065	chr6	170680	PSORS1C2	0	0	0	1	0.083
cg25425005	chr16	3050	HBZ	1	0	0	1	0.083
cg01587454	chr8	138009	DCAF4L2	0	1	0	1	0.083
cg02039171	chr14	1053	CEBPE	0	0	0	1	0.083
cg04483754	chr17	4843	NOS2	0	0	1	1	0.083
cg13928961	chr12	319101	KRT73	0	1	1	1	0.083
cg16016036	chr2	7173	TPO	0	0	1	1	0.083
cg17299712	chrX	4113	MAGEB2	0	1	1	1	0.083
cg18003795	chr22	51816	CECR1	0	0	0	1	0.083
cg26637069	chr11	187	APLNR	0	0	0	1	0.083
cg27276456	chr19	201516	ZSCAN4	NA	NA	NA	1	0.083
cg11640565	chrX	412	STS	0	0	0	1	0.083
cg17922226	chr7	1180	CLCN1	0	0	0	1	0.083
cg01671575	chr1	79605	PGBD5	0	0	1	1	0.083
cg00904483	chr10	4255	MGMT	0	0	0	1	0.083
cg20189782	chr5	408263	C5orf40	0	0	0	1	0.062
cg25600606	chr11	10114	HIPK3	0	0	0	1	0.062
cg09326702	chr11	55867	SLC22A11	0	0	0	1	0.062
cg12529228	chr1	4807	NHLH1	0	0	0	1	0.062
cg14824983	chr3	7869	SEMA3B	0	0	0	1	0.062
cg04774694	chr16	64174	DPEP2	0	0	0	1	0.062
cg06037693	chr1	864	RUNX3	0	0	0	1	0.062
cg03144357	chr8	9684	LRRC14	0	0	0	1	0.062
cg13022129	chr9	254295	PHYHD1	0	0	0	1	0.062
cg27626424	chr1	4014	LOR	0	1	1	1	0.062
cg04759756	chr20	84174	SLA2	0	0	0	1	0.062
cg21770617	chr3	131177	FAM3D	0	0	1	1	0.062
cg06590610	chr7	10320	IKZF1	0	0	0	1	0.062
cg21450627	chr2	23550	PSD4	0	0	0	1	0.062
cg01197831	chr9	8789	FBP2	0	0	0	1	0.062
cg05633152	chr14	6554	SLC10A1	0	0	0	1	0.062
cg06003187	chr1	2980	GUCA2A	0	1	0	1	0.062
cg08448751	chr3	56920	SEMA3G	0	0	0	1	0.062
cg09314766	chr8	2515	ADAM2	0	1	0	1	0.062
cg15430659	chr10	26507	CNNM1	1	1	0	1	0.062
cg22309489	chr16	29948	OSGIN1	0	0	0	1	0.062
cg00033773	chr19	84292	MORG1	0	0	0	1	0.062
cg19875656	chr3	29122	PRSS50	0	0	0	1	0.062
cg20398120	chr2	53632	PRKAG3	0	0	0	1	0.062
cg20657383	chr19	634	CEACAM1	0	0	0	1	0.062
cg25552889	chr3	131408	FAM131A	0	0	0	1	0.062
cg27056559	chr10	4255	MGMT	0	0	0	1	0.062
cg07955887	chr18	23255	KIAA0802	0	0	0	1	0.062
cg02157083	chr11	116519	APOA5	0	0	0	1	0.062
cg12413566	chr3	165904	XIRP1	0	0	0	1	0.062
cg18168989	chr9	138199	C9orf41	0	0	0	1	0.062
cg19515446	chr6	3010	HIST1H1T	0	0	0	1	0.062
cg00062776	chr19	7288	TULP2	0	0	0	1	0.062
cg02582754	chr6	4142	MAS1	0	0	0	1	0.062
cg06692050	chr10	6425	SFRP5	1	0	0	1	0.062
cg08626653	chr7	222950	C7orf51	0	0	0	1	0.062
cg10376763	chr2	7141	TNP1	0	1	0	1	0.062
cg12497692	chr19	27033	ZBTB32	0	0	0	1	0.062
cg15559737	chr22	1413	CRYBA4	0	0	0	1	0.062
cg15946807	chr3	339896	GADL1	0	1	0	1	0.062
cg16540704	chr7	136991	ASZ1	0	0	0	1	0.062
cg18655584	chr11	5002	SLC22A18	0	0	0	1	0.062
cg24650229	chr3	152404	IGSF11	0	0	0	1	0.062
cg27292431	chr6	6580	SLC22A1	0	0	0	1	0.062
cg01526089	chr17	5023	P2RX1	0	0	0	1	0.062
cg09099177	chr15	91860	CALML4	0	0	0	1	0.062
cg09513026	chr5	7478	WNT8A	1	0	0	1	0.062
cg12428416	chr13	2700	GJA3	0	0	0	1	0.062
cg18081313	chr12	8408	ULK1	0	0	0	1	0.062
cg23323879	chr15	8483	CILP	0	0	0	1	0.062
cg25162794	chr2	200539	ANKRD23	0	0	0	1	0.062
cg26267561	chr20	5020	OXT	1	0	0	1	0.062
cg01407341	chr15	145946	SPATA8	0	1	1	1	0.062
cg04127255	chr19	5670	PSG2	0	1	0	1	0.062
cg05942970	chr10	282973	JAKMIP3	0	0	0	1	0.062
cg06090864	chr19	2864	FFAR1	0	1	1	1	0.062
cg06517798	chr1	480	ATP1A4	0	1	0	1	0.062
cg09044738	chr14	10876	FAM12A	0	0	1	1	0.062
cg11828089	chr7	83698	CALN1	0	1	1	1	0.062
cg12485992	chr17	84690	SPATA22	0	1	1	1	0.062
cg12582965	chr15	57194	ATP10A	0	0	0	1	0.062
cg17407908	chr6	177	AGER	0	1	0	1	0.062
cg18931750	chr19	284382	ACTL9	0	1	1	1	0.062
cg19964192	chrX	4109	MAGEA10	0	1	1	1	0.062
cg21003606	chr7	83698	CALN1	0	1	1	1	0.062
cg23274244	chr17	23495	TNFRSF13B	NA	NA	NA	1	0.062
cg26389232	chr15	692236	SNORD116@	0	0	0	1	0.062
cg00727947	chr19	353514	LILRA5	0	1	1	1	0.062
cg04366367	chr17	2873	GPS1	0	0	0	1	0.062
cg05111110	chr11	78999	LRFN4	0	0	0	1	0.062
cg08458170	chr19	57616	TSHZ3	0	0	0	1	0.062
cg22286764	chr3	339883	C3orf35	0	0	0	1	0.062
cg06919067	chr16	197370	NSMCE1	0	0	0	1	0.062
cg17067942	chr5	79770	TXNDC15	0	0	0	1	0.062
cg10356463	chr3	3697	ITIH1	0	0	0	1	0.062
cg13618372	chr2	6711	SPTBN1	0	0	0	1	0.062
cg04405541	chr20	92747	C20orf114	0	1	1	1	0.062
cg15772361	chr18	6317	SERPINB3	0	1	1	1	0.062
cg11254522	chr1	2268	FGR	0	0	0	1	0.062
cg23326301	chr1	11085	ADAM30	0	0	0	1	0.042
cg15616400	chr1	284723	SLC25A34	0	0	0	1	0.042
cg20199333	chr11	2147	F2	0	0	0	1	0.042
cg13506226	chr13	10161	LPAR6	NA	NA	NA	1	0.042
cg07125166	chr3	285231	FBXW12	0	0	0	1	0.042
cg11504739	chr11	7356	SCGB1A1	0	0	0	1	0.042
cg24276445	chr6	1268	CNR1	0	1	1	1	0.042
cg24411312	chr11	6768	ST14	1	0	0	1	0.042
cg24919884	chr1	27237	ARHGEF16	0	0	0	1	0.042
cg26309498	chr2	10913	EDAR	0	0	0	1	0.042
cg00686022	chr12	283461	C12orf40	0	1	1	1	0.042
cg02803836	chr10	4255	MGMT	0	0	0	1	0.042
cg12044210	chr15	321	APBA2	0	0	0	1	0.042
cg19869139	chr1	4985	OPRD1	1	0	0	1	0.042
cg21575929	chr5	147	ADRA1B	1	1	0	1	0.042
cg26852159	chr17	92591	ASB16	0	0	0	1	0.042
cg18641937	chr1	142683	ITLN2	0	0	1	1	0.042
cg05782292	chr11	6343	SCT	NA	NA	NA	1	0.042
cg07008350	chr18	162699	TCEB3C	0	0	0	1	0.042
cg19569684	chr5	51237	MGC29506	0	0	0	1	0.042
cg06803253	chr3	2779	GNAT1	0	0	0	1	0.042
cg07634706	chr16	6361	CCL17	NA	NA	NA	1	0.042
cg13247990	chr16	91807	MYLK3	0	0	0	1	0.042
cg18854045	chr2	285150	FLJ33534	0	1	0	1	0.042
cg20862119	chr12	51350	KRT76	0	1	1	1	0.042
cg22290566	chr15	79748	LMAN1L	0	0	0	1	0.042
cg24697329	chr2	50649	ARHGEF4	0	1	1	1	0.042
cg25548825	chr11	347853	TBX10	0	0	0	1	0.042
cg27550918	chr10	79933	SYNPO2L	0	0	0	1	0.042
cg00988256	chr19	26526	TSPAN16	0	0	0	1	0.042
cg22150335	chr10	288	ANK3	0	0	0	1	0.042
cg12215675	chr6	83887	TTLL2	0	0	1	1	0.042
cg20683151	chr2	79853	TM4SF20	0	0	0	1	0.042
cg24248317	chr2	54978	C2orf18	0	0	0	1	0.042
cg06192619	chr19	6511	SLC1A6	0	0	1	1	0.042
cg09354331	chr10	57178	ZMIZ1	0	0	0	1	0.042
cg13685294	chr3	2912	GRM2	1	0	0	1	0.042
cg19324627	chr11	335	APOA1	0	0	0	1	0.042
cg20377762	chr1	199964	TMEM61	1	0	0	1	0.042
cg20891917	chr7	3475	IFRD1	0	0	0	1	0.042
cg26301777	chr13	79612	NARG1L	0	0	0	1	0.042
cg01871963	chr9	3934	LCN2	0	0	0	1	0.042
cg21130124	chr10	51806	CALML5	0	0	0	1	0.042
cg26536164	chr3	83597	RTP3	0	0	0	1	0.042
cg01095482	chr1	7075	TIE1	0	0	0	1	0.042
cg01998785	chr16	54947	LPCAT2	0	0	0	1	0.042
cg03113824	chr19	93233	CCDC114	0	0	0	1	0.042
cg06435786	chr2	3631	INPP4A	0	0	0	1	0.042
cg06832950	chr14	51062	ATL1	0	0	0	1	0.042
cg09394600	chr17	9135	RABEP1	0	0	0	1	0.042
cg09737668	chr1	89886	SLAMF9	0	0	0	1	0.042
cg10059104	chr22	164592	CCDC116	0	0	0	1	0.042
cg10173675	chr2	64284	RAB17	0	0	0	1	0.042
cg10298205	chr8	93100	NAPRT1	0	0	0	1	0.042
cg12510502	chr11	5002	SLC22A18	0	0	0	1	0.042
cg14414534	chr9	7111	TMOD1	0	0	0	1	0.042
cg14519134	chr3	132243	H1FOO	0	0	0	1	0.042
cg14792155	chr15	123745	PLA2G4E	0	0	0	1	0.042
cg18561362	chr11	114900	C1QTNF4	0	0	0	1	0.042
cg21378206	chr2	26525	IL1F5	0	0	1	1	0.042
cg21951612	chr3	22808	MRAS	0	0	0	1	0.042
cg23042138	chr3	29072	SETD2	0	0	0	1	0.042
cg24730207	chr9	80142	PTGES2	0	0	0	1	0.042
cg01265637	chr20	128653	C20orf141	0	0	0	1	0.042
cg05444024	chr19	2528	FUT6	0	0	0	1	0.042
cg06029655	chr19	1954	MEGF8	0	0	0	1	0.042
cg06940574	chr1	148645	C1orf211	0	0	0	1	0.042
cg12613344	chr11	10062	NR1H3	0	0	0	1	0.042
cg13156121	chr16	374739	TEPP	0	1	0	1	0.042
cg13224710	chr18	7050	TGIF1	0	0	0	1	0.042
cg13634864	chr7	11033	ADAP1	0	0	0	1	0.042
cg17100200	chr1	2981	GUCA2B	0	1	0	1	0.042
cg20647137	chr7	6718	AKR1D1	0	0	1	1	0.042
cg22718139	chr1	3158	HMGCS2	0	0	0	1	0.042
cg23352030	chr20	85441	PRIC285	0	0	0	1	0.042
cg26709863	chr17	8678	BECN1	NA	NA	NA	1	0.042
cg01307730	chr6	221613	HIST1H2AA	0	0	1	1	0.042
cg04037952	chr2	344561	GPR148	0	0	1	1	0.042
cg05248781	chr1	254910	LCE5A	0	0	1	1	0.042
cg08263357	chr6	5325	PLAGL1	1	0	0	1	0.042
cg09283007	chrX	170062	FAM47B	0	1	0	1	0.042
cg10705251	chr1	257101	ZNF683	0	0	0	1	0.042
cg11110686	chrX	9947	MAGEC1	0	1	1	1	0.042
cg11310496	chr10	5408	PNLIPRP2	0	0	1	1	0.042
cg15750705	chr1	127534	GJB4	0	0	1	1	0.042
cg17108383	chr5	56097	PCDHGC5	0	0	0	1	0.042
cg17237881	chr20	79444	BIRC7	0	0	0	1	0.042
cg17642353	chr19	5675	PSG6	0	1	0	1	0.042
cg18705067	chr7	222183	SRRM3	0	1	0	1	0.042
cg19561774	chr6	6582	SLC22A2	0	0	1	1	0.042
cg20082641	chr15	54852	PAQR5	1	0	0	1	0.042
cg20277670	chr5	3274	HRH2	0	1	1	1	0.042
cg20751395	chr11	3784	KCNQ1	0	0	0	1	0.042
cg25708912	chrX	63904	DUSP21	0	0	0	1	0.042
cg26750319	chr11	3784	KCNQ1	0	0	0	1	0.042
cg27050763	chr1	25909	AHCTF1	0	0	0	1	0.042
cg27305662	chr6	29113	C6orf15	0	0	0	1	0.042
cg07296772	chr14	29082	CHMP4A	0	0	0	1	0.042
cg11234457	chr5	94033	FTMT	0	1	1	1	0.042
cg12897458	chr16	64146	PDF	0	0	0	1	0.042
cg14820573	chr16	79622	SNRNP25	0	0	0	1	0.042
cg15316289	chr22	79174	CRELD2	0	0	0	1	0.042
cg18328190	chr3	339883	C3orf35	0	0	0	1	0.042
cg24895052	chr17	4356	MPP3	1	0	0	1	0.042
cg24912560	chr11	27288	RBMXL2	0	1	1	1	0.042
cg07594933	chr12	84318	CCDC77	NA	NA	NA	1	0.042
cg27056145	chr3	10533	ATG7	0	0	0	1	0.042
cg16087263	chr1	64600	PLA2G2F	0	0	0	1	0.042
cg18481241	chr13	5925	RB1	0	0	0	1	0.042
cg04385519	chr16	115	ADCY9	0	0	0	1	0.042
cg18130069	chr4	6002	RGS12	0	0	0	1	0.042
cg21399079	chr2	11250	GPR45	0	0	0	1	0.042
cg23655719	chr9	6363	CCL19	0	1	0	1	0.042
cg24053375	chr10	5949	RBP3	0	0	0	1	0.042
cg15516226	chr5	153579	BTNL9	0	0	1	1	0.042
cg20256783	chr12	9119	KRT75	0	1	0	1	0.042
cg22218909	chr8	1668	DEFA3	0	0	1	1	0.042
cg24928161	chr17	6462	SHBG	0	0	0	1	0.042
cg19882093	chr20	92086	GGTLC1	0	1	1	1	0.042
cg22827524	chr1	400823	FAM177B	NA	NA	NA	1	0.021
cg25612145	chr7	56164	STK31	0	0	0	1	0.021
cg15933546	chr6	1769	DNAH8	0	0	0	1	0.021
cg20732137	chr20	26205	GMEB2	NA	NA	NA	1	0.021
cg25412453	chr1	127579	DCST2	0	0	0	1	0.021
cg17524886	chr12	55743	CHFR	0	0	0	1	0.021
cg18506679	chr9	169611	OLFML2A	0	0	0	1	0.021
cg16825643	chr16	9780	FAM38A	0	0	0	1	0.021
cg00601486	chr12	341567	H1FNT	0	0	0	1	0.021
cg05547500	chr18	84203	TXNDC2	0	0	0	1	0.021
cg12467090	chr1	5287	PIK3C2B	0	0	0	1	0.021
cg14338062	chr12	64333	ARHGAP9	0	0	0	1	0.021
cg17142149	chr6	10231	RCAN2	0	0	1	1	0.021
cg18679190	chr1	4237	MFAP2	NA	NA	NA	1	0.021
cg22858308	chr6	3097	HIVEP2	0	0	0	1	0.021
cg23471482	chr16	6367	CCL22	0	0	0	1	0.021
cg26422060	chr11	347853	TBX10	0	0	0	1	0.021
cg05869585	chr16	5373	PMM2	0	0	0	1	0.021
cg11181795	chr17	2874	GPS2	NA	NA	NA	1	0.021
cg03483654	chr11	26007	DAK	0	0	0	1	0.021
cg07603484	chr19	259307	IL4I1	0	0	0	1	0.021
cg14401897	chr19	22904	SBNO2	0	0	0	1	0.021
cg18338296	chr11	7069	THRSP	0	0	0	1	0.021
cg21515329	chrX	8243	SMC1A	0	0	0	1	0.021
cg00344358	chr12	10220	GDF11	0	0	0	1	0.021
cg00623593	chr10	1793	DOCK1	0	0	0	1	0.021
cg03558807	chr5	114915	NCRNA00219	0	1	0	1	0.021
cg06762858	chr7	29992	PILRA	0	0	0	1	0.021
cg07614786	chr3	26140	TTLL3	0	0	0	1	0.021
cg13696887	chr12	3888	KRT82	0	1	0	1	0.021
cg15278682	chr10	6865	TACR2	0	0	0	1	0.021
cg16893614	chr1	257	ALX3	1	0	0	1	0.021
cg19420968	chr1	3061	HCRTR1	0	0	0	1	0.021
cg21743649	chr11	4928	NUP98	0	0	0	1	0.021
cg22670733	chr15	1136	CHRNA3	1	0	1	1	0.021
cg23487586	chr16	197196	TMEM148	0	1	0	1	0.021
cg24626923	chr2	10887	PROKR1	0	0	0	1	0.021
cg27035806	chr5	51491	NOP16	0	0	0	1	0.021
cg01206970	chr19	8541	PPFIA3	0	0	0	1	0.021
cg01274324	chr21	140290	TCP10L	0	0	0	1	0.021
cg04356968	chr1	632	BGLAP	0	0	0	1	0.021
cg05646865	chr1	200172	SLFNL1	0	0	0	1	0.021
cg05671018	chr15	256586	LYSMD2	1	0	0	1	0.021
cg06852744	chr7	165	AEBP1	0	0	0	1	0.021
cg09799156	chr1	266675	BEST4	0	0	0	1	0.021
cg10207787	chr8	5520	PPP2R2A	0	0	0	1	0.021
cg12830694	chr19	94274	PPP1R14A	0	0	0	1	0.021
cg13156411	chr3	5745	PTH1R	0	0	0	1	0.021
cg14831798	chr6	9425	CDYL	0	0	0	1	0.021
cg15770654	chr1	60672	MIIP	0	0	0	1	0.021
cg16984812	chr2	130271	PLEKHH2	0	1	0	1	0.021
cg18034859	chr20	85366	MYLK2	0	0	0	1	0.021
cg18676764	chr9	25853	DCAF12	0	0	0	1	0.021
cg23514672	chr16	146279	TEKT5	0	0	0	1	0.021
cg25077328	chr22	706	TSPO	0	0	0	1	0.021
cg25547939	chr11	7423	VEGFB	0	1	0	1	0.021
cg26879282	chr11	3784	KCNQ1	0	0	0	1	0.021
cg00412805	chr3	131377	KBTBD5	0	0	0	1	0.021
cg00434413	chrX	8260	ARD1A	0	0	0	1	0.021
cg00600110	chrX	171482	FAM9A	0	1	1	1	0.021
cg00730260	chr12	144360	C12orf67	0	1	0	1	0.021
cg00745543	chr12	341567	H1FNT	0	0	0	1	0.021
cg00912942	chr1	148345	C1orf127	0	0	0	1	0.021
cg03776850	chr16	23430	TPSD1	0	1	0	1	0.021
cg03907174	chr19	57333	RCN3	0	0	0	1	0.021
cg03930970	chr7	55146	ZDHHC4	0	0	0	1	0.021
cg03931808	chr19	117579	RLN3	0	0	0	1	0.021
cg04443324	chr5	2196	FAT2	0	1	0	1	0.021
cg04739485	chr12	22877	MLXIP	0	0	0	1	0.021
cg05423257	chr2	248	ALPI	0	1	0	1	0.021
cg07873128	chr11	114879	OSBPL5	0	0	0	1	0.021
cg08402568	chr16	146433	IL34	0	0	0	1	0.021
cg09034836	chr22	25812	POM121L1P	0	1	0	1	0.021
cg09201719	chr10	1586	CYP17A1	0	0	0	1	0.021
cg09286787	chr19	284361	C19orf63	0	0	0	1	0.021
cg10805676	chr16	10573	MRPL28	0	0	0	1	0.021
cg12347740	chr16	146433	IL34	0	0	0	1	0.021
cg14299800	chr9	27348	TOR1B	0	0	0	1	0.021
cg15142488	chr19	147719	LYPD4	0	1	1	1	0.021
cg15554401	chr1	127534	GJB4	0	0	1	1	0.021
cg16107172	chr19	10998	SLC27A5	0	0	0	1	0.021
cg16480209	chr16	1258	CNGB1	0	1	0	1	0.021
cg16571399	chr15	83660	TLN2	0	0	0	1	0.021
cg16807989	chr16	4992	OR1F1	0	0	0	1	0.021
cg16878021	chr14	3500	IGHG1	0	1	1	1	0.021
cg17561452	chr16	161931	ADAD2	0	0	0	1	0.021
cg18271969	chr3	170572	HTR3C	0	0	0	1	0.021
cg19955257	chr19	400668	PRSSL1	0	1	0	1	0.021
cg20015855	chr15	10391	CORO2B	0	1	0	1	0.021
cg22484980	chr11	219931	TPCN2	NA	NA	NA	1	0.021
cg22568540	chr19	1	A1BG	0	0	0	1	0.021
cg22675150	chr13	7278	TUBA3C	0	0	1	1	0.021
cg23704703	chr21	150082	LCA5L	0	0	0	1	0.021
cg23753610	chr17	8632	DNAH17	0	0	0	1	0.021
cg23767977	chr12	112802	KRT71	0	1	1	1	0.021
cg24105933	chr4	94031	HTRA3	0	1	0	1	0.021
cg24818418	chr4	1950	EGF	0	0	0	1	0.021
cg25803583	chr17	5345	SERPINF2	0	0	0	1	0.021
cg27349244	chr12	22877	MLXIP	0	0	0	1	0.021
cg04533291	chr2	9391	CIAO1	0	0	0	1	0.021
cg06351503	chr6	7936	RDBP	0	0	0	1	0.021
cg06391660	chr2	1639	DCTN1	0	0	0	1	0.021
cg06429195	chr3	1618	DAZL	0	0	0	1	0.021
cg06529761	chr16	1773	DNASE1	0	0	0	1	0.021
cg06584407	chr1	4878	NPPA	0	0	0	1	0.021
cg07371530	chr16	113000	RPUSD1	0	1	0	1	0.021
cg07499372	chr19	57663	USP29	0	0	1	1	0.021
cg09632585	chr5	DISCONTUNUED	DISCONTUNUED	0	0	0	1	0.021
cg11876012	chr16	79622	SNRNP25	0	0	0	1	0.021
cg14930706	chr19	147945	NLRP4	0	0	1	1	0.021
cg16332224	chr20	8813	DPM1	0	0	0	1	0.021
cg17500329	chr8	56988	C8orf17	0	0	0	1	0.021
cg17942096	chr19	8625	RFXANK	0	0	0	1	0.021
cg18797282	chr3	11068	CYB561D2	0	1	0	1	0.021
cg22552966	chr17	146802	SLC47A2	0	0	0	1	0.021
cg26224139	chr9	138162	C9orf116	0	1	0	1	0.021
cg00510956	chr1	10657	KHDRBS1	0	0	0	1	0.021
cg04282422	chrX	8712	PAGE1	0	1	1	1	0.021
cg12332316	chr5	2161	F12	0	0	0	1	0.021
cg12591323	chr2	50485	SMARCAL1	0	0	0	1	0.021
cg26783353	chr5	83884	SLC25A2	0	0	0	1	0.021
cg26870337	chr1	9923	ZBTB40	0	0	0	1	0.021
cg16396948	chr3	90102	PHLDB2	0	0	0	1	0.021
cg02044161	chr3	53833	IL20RB	0	0	0	1	0.021
cg00307685	chr1	676	BRDT	0	0	0	1	0.021
cg02523400	chr22	3053	SERPIND1	0	0	0	1	0.021
cg03712843	chr13	161003	STOML3	NA	NA	NA	1	0.021
cg04290964	chr13	1203	CLN5	0	0	0	1	0.021
cg10568796	chr22	5297	PI4KA	0	0	0	1	0.021
cg10784821	chr14	51004	COQ6	0	0	0	1	0.021
cg11304524	chr14	283629	TSSK4	0	0	0	1	0.021
cg13338132	chr12	196472	FAM71C	0	1	1	1	0.021
cg16405957	chr12	3849	KRT2	0	1	1	1	0.021
cg17055734	chr2	1418	CRYGA	0	0	0	1	0.021
cg17088290	chr12	269	AMHR2	0	0	0	1	0.021
cg17778120	chr3	5948	RBP2	0	0	0	1	0.021
cg17904068	chr12	55743	CHFR	0	0	0	1	0.021
cg19196684	chr1	6512	SLC1A7	0	0	0	1	0.021
cg20342082	chr1	339501	PRSS38	0	1	0	1	0.021
cg20851245	chr2	64320	RNF25	0	0	0	1	0.021
cg21230392	chr4	8842	PROM1	0	0	0	1	0.021
cg21939221	chr11	79841	AGBL2	0	0	0	1	0.021
cg23836174	chr22	29802	VPREB3	0	0	0	1	0.021
cg24661752	chr3	1173	AP2M1	0	0	0	1	0.021
cg03704653	chrX	171482	FAM9A	0	1	1	1	0.021
cg09543783	chr19	79147	FKRP	0	0	0	1	0.021
cg19393233	chr7	2086	ERV3	NA	NA	NA	1	0.021
cg22932819	chr7	10457	GPNMB	0	0	0	1	0.021
cg03389164	chr14	51676	ASB2	0	0	0	1	0.021
cg05261299	chr12	3164	NR4A1	0	1	0	1	0.021
cg08365982	chr3	859	CAV3	0	1	0	1	0.021
cg10215079	chr12	6866	TAC3	0	0	0	1	0.021
cg13466487	chr5	134147	CMBL	0	0	0	1	0.021
cg14356114	chrX	9506	PAGE4	NA	NA	NA	1	0.021
cg21226234	chr8	9684	LRRC14	0	0	0	1	0.021
cg24335149	chr1	5322	PLA2G5	0	0	0	1	0.021
cg25852715	chr11	114879	OSBPL5	0	0	0	1	0.021
cg01614759	chr10	7570	ZNF22	NA	NA	NA	1	0.021
cg09076584	chr17	124923	FLJ25006	0	0	0	1	0.021
cg11476254	chr16	197322	ACSF3	0	0	0	1	0.021
cg15536230	chr21	54145	H2BFS	0	0	0	1	0.021
cg17398613	chr21	54020	SLC37A1	0	0	1	1	0.021
cg21060429	chr7	4521	NUDT1	0	0	0	1	0.021
cg25690265	chr16	79838	TMC5	0	0	1	1	0.021
cg07740640	chr7	168620	BHLHA15	0	0	0	1	0.021
cg16408565	chr9	5005	ORM2	0	0	0	1	0.021
cg19394737	chr2	255101	CCDC108	0	0	1	1	0.021
cg27278802	chr11	9973	CCS	0	0	0	1	0.021
cg02059813	chr3	6596	HLTF	1	0	0	1	0.021
cg17384214	chr6	50854	C6orf48	0	0	0	1	0.021
cg13249256	chr1	84944	MAEL	0	0	1	1	0.021
cg15597540	chr3	11068	CYB561D2	0	1	0	1	0.021
cg18589624	chr7	11185	INMT	0	0	0	1	0.021
cg19538485	chr14	10202	DHRS2	0	0	1	1	0.021
cg02847216	chr18	64693	CTAGE1	0	0	0	1	0.021
cg03555203	chr19	57616	TSHZ3	0	0	0	1	0.021
cg03734783	chr7	9311	ACCN3	0	0	0	1	0.021
cg05921581	chr12	374454	KRT77	0	1	1	1	0.021
cg07356189	chrX	1527	TEX28	0	0	0	1	0.021
cg07851192	chr18	26251	KCNG2	0	0	0	1	0.021
cg08245789	chr22	150350	ENTHD1	0	1	0	1	0.021
cg11360149	chr5	285659	OR2V2	0	0	1	1	0.021
cg14736210	chr20	3745	KCNB1	1	1	1	1	0.021
cg15222604	chrX	3054	HCFC1	0	0	0	1	0.021
cg15677355	chrX	139562	OTUD6A	0	1	0	1	0.021
cg15812071	chrX	55998	NXF5	0	1	1	1	0.021
cg19219503	chr10	91074	ANKRD30A	0	1	1	1	0.021
cg24388263	chr19	55702	CCDC94	0	0	0	1	0.021
cg27557796	chr6	80740	LY6G6C	0	0	0	1	0.021

## Sheet: Breast CA
IlmnID	Chromosome	GeneID	Gene Symbol	PCGT	colon-PMD	IMR-PMD	MESC	HypoM-freq(Cancer)
cg17399166	chr1	912	CD1D	1	1	1	1	0.664
cg09451092	chr1	25790	CCDC19	0	0	0	1	0.619
cg16612699	chr11	26493	OR8B8	0	1	1	1	0.602
cg21003606	chr7	83698	CALN1	0	1	1	1	0.602
cg24926042	chr12	3888	KRT82	0	1	0	1	0.584
cg15075718	chr11	83552	MFRP	0	0	0	1	0.575
cg01731341	chr12	2251	FGF6	0	0	1	1	0.566
cg04757243	chr3	80111	C3orf36	0	0	0	1	0.549
cg11512771	chr1	1893	ECM1	0	0	0	1	0.54
cg19561774	chr6	6582	SLC22A2	0	0	1	1	0.531
cg06255227	chr20	2832	NPBWR2	0	1	0	1	0.522
cg25162301	chr3	197	AHSG	0	0	0	1	0.513
cg08124722	chr17	6354	CCL7	0	1	0	1	0.478
cg24423088	chr21	337879	KRTAP8-1	0	1	1	1	0.469
cg15648315	chr13	400165	C13orf35	0	0	0	1	0.434
cg04523589	chr3	820	CAMP	0	0	0	1	0.425
cg13500819	chr5	51237	MGC29506	0	0	0	1	0.416
cg13126790	chr6	401281	FLJ27255	0	1	0	1	0.407
cg18986165	chr19	89858	SIGLEC12	0	1	1	1	0.398
cg15905124	chr5	134288	TMEM174	NA	NA	NA	1	0.389
cg02947253	chr1	140	ADORA3	0	0	0	1	0.389
cg24697329	chr2	50649	ARHGEF4	0	1	1	1	0.389
cg03044435	chr4	401114	FLJ35816	0	0	0	1	0.354
cg25061755	chr2	11037	STON1	0	1	0	1	0.354
cg22917487	chr3	1524	CX3CR1	0	0	1	1	0.354
cg16016036	chr2	7173	TPO	0	0	1	1	0.345
cg05248781	chr1	254910	LCE5A	0	0	1	1	0.345
cg12703269	chr15	9051	PSTPIP1	0	0	0	1	0.336
cg12593411	chr19	83854	ANGPTL6	0	0	0	1	0.327
cg00213044	chr12	3853	KRT6A	0	1	1	1	0.327
cg22495124	chr17	27091	CACNG5	0	1	0	1	0.327
cg09296212	chr9	203245	NAIF1	0	0	0	1	0.319
cg15028436	chr7	51314	TXNDC3	0	1	1	1	0.31
cg16777782	chr16	1012	CDH13	0	0	0	1	0.31
cg07955887	chr18	23255	KIAA0802	0	0	0	1	0.301
cg02679745	chr9	2529	FUT7	0	0	0	1	0.301
cg07349094	chr2	3899	AFF3	0	1	0	1	0.301
cg09914304	chr10	5551	PRF1	0	1	0	1	0.301
cg14014613	chr17	4994	OR3A1	0	0	1	1	0.301
cg22218909	chr8	1668	DEFA3	0	0	1	1	0.292
cg26536164	chr3	83597	RTP3	0	0	0	1	0.283
cg04774694	chr16	64174	DPEP2	0	0	0	1	0.283
cg09261262	chr10	94233	OPN4	0	0	0	1	0.283
cg05275605	chr21	378832	NCRNA00175	0	0	0	1	0.283
cg16529592	chr1	864	RUNX3	0	0	0	1	0.283
cg19569684	chr5	51237	MGC29506	0	0	0	1	0.274
cg20089715	chr17	782	CACNB1	0	0	0	1	0.274
cg02701137	chr20	22839	DLGAP4	0	1	1	1	0.265
cg05959508	chr1	80342	TRAF3IP3	0	0	0	1	0.265
cg11828089	chr7	83698	CALN1	0	1	1	1	0.248
cg00727947	chr19	353514	LILRA5	0	1	1	1	0.248
cg08430598	chr20	1469	CST1	0	1	1	1	0.248
cg05475904	chr1	8915	BCL10	0	0	0	1	0.239
cg15772361	chr18	6317	SERPINB3	0	1	1	1	0.239
cg11600161	chr11	374403	TBC1D10C	0	1	0	1	0.239
cg26852159	chr17	92591	ASB16	0	0	0	1	0.23
cg10134939	chr2	84141	FAM176A	0	0	0	1	0.221
cg02876062	chr10	83641	FAM107B	0	0	0	1	0.221
cg07824742	chr9	1621	DBH	0	0	0	1	0.221
cg03843951	chr7	1644	DDC	0	0	0	1	0.212
cg22445920	chr5	285641	SLC36A3	0	1	1	1	0.212
cg11258532	chr16	766	CA7	1	0	0	1	0.212
cg19304352	chr8	1669	DEFA4	0	0	1	1	0.204
cg26757673	chr22	3560	IL2RB	0	1	0	1	0.204
cg21942546	chr7	83451	ABHD11	0	0	0	1	0.204
cg07380416	chr11	923	CD6	0	1	0	1	0.204
cg08458170	chr19	57616	TSHZ3	0	0	0	1	0.204
cg05348870	chr19	8740	TNFSF14	0	0	0	1	0.204
cg24674703	chr11	921	CD5	0	0	0	1	0.204
cg07531356	chr9	11172	INSL6	0	1	0	1	0.195
cg00199549	chr22	4174	MCM5	0	0	0	1	0.195
cg19930802	chr15	57194	ATP10A	0	0	0	1	0.195
cg27212977	chr8	1671	DEFA6	0	0	1	1	0.195
cg03885639	chr11	116337	PANX3	0	0	0	1	0.195
cg00601486	chr12	341567	H1FNT	0	0	0	1	0.195
cg20985014	chr6	8838	WISP3	0	1	0	1	0.195
cg26751195	chr16	6693	SPN	0	0	0	1	0.186
cg09283007	chrX	170062	FAM47B	0	1	0	1	0.186
cg12582965	chr15	57194	ATP10A	0	0	0	1	0.186
cg20256783	chr12	9119	KRT75	0	1	0	1	0.186
cg24392574	chr10	51806	CALML5	0	0	0	1	0.186
cg09395732	chr3	6538	SLC6A11	1	1	1	1	0.186
cg26285698	chr16	283897	C16orf54	0	0	0	1	0.186
cg22718139	chr1	3158	HMGCS2	0	0	0	1	0.177
cg24626923	chr2	10887	PROKR1	0	0	0	1	0.177
cg00441136	chr20	9371	KIF3B	0	0	0	1	0.177
cg02473123	chr17	924	CD7	0	1	0	1	0.177
cg06285340	chr15	1583	CYP11A1	0	1	0	1	0.177
cg16280667	chr11	643	CXCR5	0	0	0	1	0.177
cg13928961	chr12	319101	KRT73	0	1	1	1	0.177
cg01827098	chr7	168537	GIMAP7	0	1	1	1	0.177
cg03311899	chr12	338442	GPR109A	0	0	0	1	0.168
cg12650635	chr12	359	AQP2	0	0	0	1	0.168
cg24276445	chr6	1268	CNR1	0	1	1	1	0.168
cg27276456	chr19	201516	ZSCAN4	NA	NA	NA	1	0.168
cg24457403	chr17	3868	KRT16	0	1	0	1	0.168
cg15352829	chr14	122618	PLD4	0	0	0	1	0.168
cg20751395	chr11	3784	KCNQ1	0	0	0	1	0.159
cg10719920	chr21	246704	C21orf93	0	1	0	1	0.159
cg20691580	chr11	345	APOC3	0	0	0	1	0.159
cg00974864	chr1	2215	FCGR3B	0	1	0	1	0.159
cg13145013	chr11	283120	H19	0	1	0	1	0.15
cg18450227	chr18	5596	MAPK4	0	0	1	1	0.15
cg19812619	chr12	3695	ITGB7	0	0	0	1	0.15
cg11884243	chr9	2220	FCN2	0	0	0	1	0.15
cg26809968	chrX	5956	OPN1LW	0	0	0	1	0.15
cg11234457	chr5	94033	FTMT	0	1	1	1	0.15
cg13985639	chr10	112817	DHDPSL	0	0	0	1	0.142
cg19538485	chr14	10202	DHRS2	0	0	1	1	0.142
cg27387222	chr12	10059	DNM1L	0	0	0	1	0.142
cg01567482	chr5	10636	RGS14	0	0	0	1	0.142
cg11360149	chr5	285659	OR2V2	0	0	1	1	0.142
cg16480209	chr16	1258	CNGB1	0	1	0	1	0.142
cg26750319	chr11	3784	KCNQ1	0	0	0	1	0.142
cg14864603	chr17	15	AANAT	0	0	0	1	0.142
cg01587454	chr8	138009	DCAF4L2	0	1	0	1	0.133
cg12575181	chr14	5283	PIGH	0	0	0	1	0.133
cg03842617	chr7	4846	NOS3	0	0	0	1	0.133
cg05546038	chr16	8996	NOL3	1	0	0	1	0.133
cg24443136	chrX	492	ATP2B3	0	0	0	1	0.133
cg10246520	chr13	10562	OLFM4	0	0	1	1	0.133
cg25087423	chr11	643	CXCR5	0	0	0	1	0.124
cg03243506	chr20	117532	TMC2	0	0	0	1	0.124
cg12591323	chr2	50485	SMARCAL1	0	0	0	1	0.124
cg21367957	chr13	2159	F10	0	0	0	1	0.124
cg26879282	chr11	3784	KCNQ1	0	0	0	1	0.124
cg11132751	chrX	340602	CXorf67	0	1	1	1	0.124
cg14930706	chr19	147945	NLRP4	0	0	1	1	0.115
cg16571399	chr15	83660	TLN2	0	0	0	1	0.115
cg20119871	chr15	57194	ATP10A	0	0	0	1	0.115
cg25934198	chr9	401563	C9orf139	0	0	0	1	0.115
cg04697562	chr7	221914	GPC2	1	0	0	1	0.115
cg08402568	chr16	146433	IL34	0	0	0	1	0.115
cg26918728	chr3	7869	SEMA3B	1	0	0	1	0.115
cg18705776	chr10	810	CALML3	0	0	0	1	0.115
cg19882093	chr20	92086	GGTLC1	0	1	1	1	0.115
cg24517042	chr3	859	CAV3	0	1	0	1	0.115
cg02082571	chr12	50856	CLEC4A	0	0	0	1	0.115
cg12044210	chr15	321	APBA2	0	0	0	1	0.115
cg07506795	chr16	7567	ZNF19	0	0	0	1	0.115
cg07339327	chr11	595	CCND1	0	0	0	1	0.106
cg25548825	chr11	347853	TBX10	0	0	0	1	0.106
cg05322019	chr10	57715	SEMA4G	0	1	0	1	0.106
cg07331725	chr18	5268	SERPINB5	0	0	1	1	0.106
cg24264578	chr16	4993	OR2C1	0	0	0	1	0.106
cg15222604	chrX	3054	HCFC1	0	0	0	1	0.106
cg02377083	chr3	1238	CCBP2	NA	NA	NA	1	0.106
cg09902130	chr11	923	CD6	0	1	0	1	0.106
cg00544557	chr21	259234	DSCR10	0	1	0	1	0.106
cg06468695	chr17	146849	CCDC42	0	1	0	1	0.106
cg17232861	chr6	10107	TRIM10	0	0	0	1	0.106
cg22642718	chr17	3768	KCNJ12	0	0	0	1	0.106
cg26015133	chr1	127943	FCRLB	0	0	0	1	0.106
cg15750705	chr1	127534	GJB4	0	0	1	1	0.106
cg21130124	chr10	51806	CALML5	0	0	0	1	0.106
cg19869139	chr1	4985	OPRD1	1	0	0	1	0.106
cg24919884	chr1	27237	ARHGEF16	0	0	0	1	0.106
cg10805676	chr16	10573	MRPL28	0	0	0	1	0.097
cg12099032	chr7	51314	TXNDC3	0	1	1	1	0.097
cg05475277	chr22	80020	FOXRED2	0	0	0	1	0.097
cg04759756	chr20	84174	SLA2	0	0	0	1	0.097
cg11221132	chr22	1564	CYP2D7P1	0	0	0	1	0.097
cg16204289	chr2	84141	FAM176A	0	0	0	1	0.097
cg23767977	chr12	112802	KRT71	0	1	1	1	0.097
cg18989919	chr3	80111	C3orf36	0	0	0	1	0.097
cg10037068	chr2	7456	WIPF1	0	1	0	1	0.097
cg17806989	chr13	56163	RNF17	0	1	1	1	0.088
cg05384917	chr12	8843	GPR109B	0	0	0	1	0.088
cg13270853	chr12	55743	CHFR	0	0	0	1	0.088
cg26389232	chr15	692236	SNORD116@	0	0	0	1	0.088
cg01407341	chr15	145946	SPATA8	0	1	1	1	0.088
cg23773532	chr12	55507	GPRC5D	0	0	0	1	0.088
cg26491484	chr9	10319	LAMC3	0	1	0	1	0.088
cg02449608	chr19	147685	C19orf18	0	0	0	1	0.088
cg03555203	chr19	57616	TSHZ3	0	0	0	1	0.088
cg05766474	chr17	6360	CCL16	0	0	1	1	0.088
cg10408410	chr15	6017	RLBP1	0	0	0	1	0.088
cg13605579	chr2	250	ALPP	0	0	0	1	0.088
cg15559737	chr22	1413	CRYBA4	0	0	0	1	0.088
cg12215675	chr6	83887	TTLL2	0	0	1	1	0.088
cg15946807	chr3	339896	GADL1	0	1	0	1	0.088
cg16358738	chr2	189	AGXT	0	0	0	1	0.088
cg12213910	chr6	135250	RAET1E	0	0	0	1	0.088
cg07485777	chr4	166655	TRIM60	0	0	0	1	0.088
cg26298099	chr14	2103	ESRRB	0	1	1	1	0.088
cg17941312	chr20	9837	GINS1	NA	NA	NA	1	0.088
cg16159313	chr3	95	ACY1	0	0	0	1	0.088
cg20657383	chr19	634	CEACAM1	0	0	0	1	0.08
cg01307730	chr6	221613	HIST1H2AA	0	0	1	1	0.08
cg05404787	chr2	348738	C2orf48	0	0	0	1	0.08
cg06799664	chr17	8632	DNAH17	0	0	0	1	0.08
cg22827524	chr1	400823	FAM177B	NA	NA	NA	1	0.08
cg20377762	chr1	199964	TMEM61	1	0	0	1	0.08
cg22484980	chr11	219931	TPCN2	NA	NA	NA	1	0.08
cg04037952	chr2	344561	GPR148	0	0	1	1	0.08
cg14820573	chr16	79622	SNRNP25	0	0	0	1	0.08
cg24411312	chr11	6768	ST14	1	0	0	1	0.08
cg12038710	chr8	1015	CDH17	0	0	0	1	0.08
cg17642353	chr19	5675	PSG6	0	1	0	1	0.08
cg17384214	chr6	50854	C6orf48	0	0	0	1	0.08
cg04825431	chr10	8187	ZNF239	0	0	0	1	0.071
cg24399405	chr16	8131	C16orf35	NA	NA	NA	1	0.071
cg11504739	chr11	7356	SCGB1A1	0	0	0	1	0.071
cg01853981	chr12	112802	KRT71	0	1	1	1	0.071
cg12485992	chr17	84690	SPATA22	0	1	1	1	0.071
cg15679098	chr11	5913	RAPSN	0	0	0	1	0.071
cg16964535	chr2	285126	DNAJC5G	0	0	0	1	0.071
cg18506679	chr9	169611	OLFML2A	0	0	0	1	0.071
cg14792155	chr15	123745	PLA2G4E	0	0	0	1	0.071
cg13384498	chr2	1419	CRYGB	0	0	0	1	0.071
cg17142149	chr6	10231	RCAN2	0	0	1	1	0.071
cg20790540	chr6	171558	PTCRA	0	0	0	1	0.071
cg10715231	chr5	11063	SOX30	0	0	0	1	0.071
cg24678320	chr19	126375	ZNF792	0	0	0	1	0.071
cg21045388	chr1	23254	RP1-21O18.1	0	0	0	1	0.071
cg18604842	chr22	164592	CCDC116	0	0	0	1	0.071
cg07084709	chr15	145781	GCOM1	1	0	0	1	0.062
cg08032971	chr1	127343	DMBX1	0	0	1	1	0.062
cg15603885	chr8	137735	ABRA	0	0	0	1	0.062
cg24053375	chr10	5949	RBP3	0	0	0	1	0.062
cg03754063	chr19	9817	KEAP1	0	0	0	1	0.062
cg05441133	chr10	2658	GDF2	0	0	0	1	0.062
cg16017492	chr17	2125	EVPL	0	0	0	1	0.062
cg26422060	chr11	347853	TBX10	0	0	0	1	0.062
cg08137716	chr17	284076	TTLL6	0	0	0	1	0.062
cg11554937	chr9	3293	HSD17B3	0	0	0	1	0.062
cg11845202	chr12	196374	KRT78	0	1	0	1	0.062
cg14358743	chr13	2621	GAS6	0	0	0	1	0.062
cg21022247	chr12	51411	BIN2	0	0	0	1	0.062
cg18152830	chr17	23495	TNFRSF13B	0	0	0	1	0.062
cg20189782	chr5	408263	C5orf40	0	0	0	1	0.062
cg25729716	chr17	974	CD79B	0	0	0	1	0.062
cg00491404	chr1	79574	EPS8L3	0	0	0	1	0.062
cg06037693	chr1	864	RUNX3	0	0	0	1	0.062
cg13770446	chr1	1187	CLCNKA	0	0	0	1	0.062
cg04127255	chr19	5670	PSG2	0	1	0	1	0.062
cg07890954	chr15	10002	NR2E3	0	0	0	1	0.062
cg10322876	chr19	1555	CYP2B6	0	0	1	1	0.062
cg00686022	chr12	283461	C12orf40	0	1	1	1	0.062
cg16192029	chr7	56311	ANKRD7	0	0	0	1	0.062
cg16878021	chr14	3500	IGHG1	0	1	1	1	0.053
cg08775793	chr22	8542	APOL1	0	0	0	1	0.053
cg23036025	chr19	10998	SLC27A5	0	0	0	1	0.053
cg00062776	chr19	7288	TULP2	0	0	0	1	0.053
cg02432101	chr18	162699	TCEB3C	0	0	0	1	0.053
cg13434852	chr10	1793	DOCK1	0	0	0	1	0.053
cg06094150	chr16	4490	MT1B	0	1	0	1	0.053
cg13696887	chr12	3888	KRT82	0	1	0	1	0.053
cg14401454	chr14	122664	TPPP2	0	0	0	1	0.053
cg17299712	chrX	4113	MAGEB2	0	1	1	1	0.053
cg24613957	chr1	30814	PLA2G2E	0	0	0	1	0.053
cg08936952	chr14	399671	HEATR4	0	0	0	1	0.053
cg15677355	chrX	139562	OTUD6A	0	1	0	1	0.053
cg00226923	chr6	221472	FGD2	0	0	0	1	0.053
cg02194211	chr3	131177	FAM3D	0	0	1	1	0.053
cg14009312	chr19	6794	STK11	0	0	0	1	0.053
cg02847216	chr18	64693	CTAGE1	0	0	0	1	0.053
cg18557145	chr9	971	CD72	0	0	0	1	0.053
cg07894717	chr1	1325	CORT	0	0	0	1	0.053
cg05111110	chr11	78999	LRFN4	0	0	0	1	0.053
cg01871963	chr9	3934	LCN2	0	0	0	1	0.053
cg21230392	chr4	8842	PROM1	0	0	0	1	0.053
cg12897458	chr16	64146	PDF	0	0	0	1	0.053
cg26099316	chr3	3699	ITIH3	0	0	0	1	0.044
cg26287988	chr21	574	BAGE	NA	NA	NA	1	0.044
cg15770654	chr1	60672	MIIP	0	0	0	1	0.044
cg07944811	chr7	2645	GCK	0	0	0	1	0.044
cg11212312	chr5	3562	IL3	0	0	0	1	0.044
cg15554401	chr1	127534	GJB4	0	0	1	1	0.044
cg19196684	chr1	6512	SLC1A7	0	0	0	1	0.044
cg00412805	chr3	131377	KBTBD5	0	0	0	1	0.044
cg08782122	chr7	346547	FLJ42291	0	1	1	1	0.044
cg21958034	chr3	4485	MST1	0	0	0	1	0.044
cg00730260	chr12	144360	C12orf67	0	1	0	1	0.044
cg22858308	chr6	3097	HIVEP2	0	0	0	1	0.044
cg16413535	chr4	84076	TKTL2	0	0	1	1	0.044
cg05633152	chr14	6554	SLC10A1	0	0	0	1	0.044
cg10673431	chr1	6282	S100A11	0	1	0	1	0.044
cg17142134	chr3	6514	SLC2A2	0	0	0	1	0.044
cg05564657	chr3	13	AADAC	0	0	0	1	0.044
cg07127957	chr10	79933	SYNPO2L	0	0	0	1	0.044
cg13140464	chr15	8120	AP3B2	0	1	1	1	0.044
cg02431687	chr9	203245	NAIF1	0	0	0	1	0.044
cg05782292	chr11	6343	SCT	NA	NA	NA	1	0.044
cg18714560	chr11	6343	SCT	NA	NA	NA	1	0.044
cg26756862	chr7	1180	CLCN1	0	0	0	1	0.044
cg22458065	chr6	170680	PSORS1C2	0	0	0	1	0.044
cg18521925	chr6	85413	SLC22A16	0	0	0	1	0.044
cg20398120	chr2	53632	PRKAG3	0	0	0	1	0.044
cg13249256	chr1	84944	MAEL	0	0	1	1	0.044
cg13179915	chr11	10089	KCNK7	0	0	0	1	0.035
cg21432513	chr12	55743	CHFR	0	0	0	1	0.035
cg03112869	chr3	285231	FBXW12	0	0	0	1	0.035
cg12491710	chr19	3982	LIM2	0	0	0	1	0.035
cg11110686	chrX	9947	MAGEC1	0	1	1	1	0.035
cg15467759	chr5	3340	NDST1	0	0	0	1	0.035
cg21399079	chr2	11250	GPR45	0	0	0	1	0.035
cg23753610	chr17	8632	DNAH17	0	0	0	1	0.035
cg06849227	chr17	81033	KCNH6	0	0	0	1	0.035
cg16778148	chr11	3784	KCNQ1	0	0	0	1	0.035
cg17993949	chr11	116085	SLC22A12	0	0	0	1	0.035
cg18705067	chr7	222183	SRRM3	0	1	0	1	0.035
cg23323879	chr15	8483	CILP	0	0	0	1	0.035
cg05745457	chr4	84076	TKTL2	0	0	1	1	0.035
cg09750183	chr11	5222	PGA5	0	0	0	1	0.035
cg07125166	chr3	285231	FBXW12	0	0	0	1	0.035
cg08201421	chr20	7125	TNNC2	0	0	0	1	0.035
cg08495878	chr14	5267	SERPINA4	0	0	1	1	0.035
cg21522797	chr16	5336	PLCG2	0	1	0	1	0.035
cg14804557	chr14	2003	ELK2P1	0	1	0	1	0.035
cg21575929	chr5	147	ADRA1B	1	1	0	1	0.035
cg01007201	chr12	50856	CLEC4A	0	0	0	1	0.035
cg09155025	chr8	55630	SLC39A4	0	0	0	1	0.035
cg10215079	chr12	6866	TAC3	0	0	0	1	0.035
cg19964192	chrX	4109	MAGEA10	0	1	1	1	0.035
cg22870280	chr15	10017	BCL2L10	1	0	0	1	0.035
cg11566199	chr12	11226	GALNT6	0	0	0	1	0.035
cg04356968	chr1	632	BGLAP	0	0	0	1	0.035
cg15530356	chr19	84330	ZNF414	0	0	0	1	0.035
cg10221501	chr16	113540	CMTM1	0	0	0	1	0.035
cg11876012	chr16	79622	SNRNP25	0	0	0	1	0.035
cg24580001	chr11	283234	CCDC88B	0	0	0	1	0.035
cg06940574	chr1	148645	C1orf211	0	0	0	1	0.035
cg14338062	chr12	64333	ARHGAP9	0	0	0	1	0.035
cg18797282	chr3	11068	CYB561D2	0	1	0	1	0.035
cg25077328	chr22	706	TSPO	0	0	0	1	0.035
cg25813714	chr19	66002	CYP4F12	0	0	1	1	0.035
cg21710060	chr13	6011	GRK1	0	0	0	1	0.035
cg24027342	chr11	472	ATM	NA	NA	NA	1	0.035
cg17100200	chr1	2981	GUCA2B	0	1	0	1	0.035
cg14014225	chr22	23539	SLC16A8	0	0	0	1	0.035
cg00623593	chr10	1793	DOCK1	0	0	0	1	0.027
cg01197831	chr9	8789	FBP2	0	0	0	1	0.027
cg07008350	chr18	162699	TCEB3C	0	0	0	1	0.027
cg07356189	chrX	1527	TEX28	0	0	0	1	0.027
cg10057218	chr17	55876	GSDMB	0	0	0	1	0.027
cg19728577	chr1	2981	GUCA2B	0	1	0	1	0.027
cg21358381	chr17	5539	PPY	0	1	0	1	0.027
cg19801560	chr6	8369	HIST1H4G	0	0	0	1	0.027
cg02803836	chr10	4255	MGMT	0	0	0	1	0.027
cg27383744	chr17	672	BRCA1	0	0	0	1	0.027
cg26265187	chr12	9924	PAN2	0	0	0	1	0.027
cg15536230	chr21	54145	H2BFS	0	0	0	1	0.027
cg00534856	chr19	1082	CGB	0	0	0	1	0.027
cg02039171	chr14	1053	CEBPE	0	0	0	1	0.027
cg03568718	chr1	7161	TP73	0	0	0	1	0.027
cg07150830	chr17	4843	NOS2	0	0	1	1	0.027
cg24883732	chr18	51224	TCEB3B	0	0	0	1	0.027
cg11648996	chrX	170062	FAM47B	0	1	0	1	0.027
cg07499372	chr19	57663	USP29	0	0	1	1	0.027
cg07512345	chr16	7142	TNP2	0	0	0	1	0.027
cg11830061	chr9	11172	INSL6	0	1	0	1	0.027
cg19636871	chr15	92483	LDHAL6B	0	0	0	1	0.027
cg01998785	chr16	54947	LPCAT2	0	0	0	1	0.027
cg12862537	chr20	4826	NNAT	0	0	0	1	0.027
cg18676764	chr9	25853	DCAF12	0	0	0	1	0.027
cg09632585	chr5	DISCONTUNUED	DISCONTUNUED	0	0	0	1	0.027
cg12784172	chr15	146050	ZSCAN29	0	0	0	1	0.027
cg12932195	chr22	79087	ALG12	0	0	0	1	0.027
cg16087263	chr1	64600	PLA2G2F	0	0	0	1	0.027
cg20573420	chr19	126375	ZNF792	0	0	0	1	0.027
cg09543783	chr19	79147	FKRP	0	0	0	1	0.027
cg11043092	chr8	79648	MCPH1	0	0	0	1	0.027
cg16984812	chr2	130271	PLEKHH2	0	1	0	1	0.027
cg14893129	chr17	79092	CARD14	0	0	0	1	0.027
cg22325715	chr17	124817	CNTD1	0	0	0	1	0.027
cg26530497	chr13	54937	SOHLH2	0	1	0	1	0.027
cg05444024	chr19	2528	FUT6	0	0	0	1	0.027
cg24928161	chr17	6462	SHBG	0	0	0	1	0.027
cg16893614	chr1	257	ALX3	1	0	0	1	0.027
cg01274324	chr21	140290	TCP10L	0	0	0	1	0.027
cg04443324	chr5	2196	FAT2	0	1	0	1	0.027
cg06692050	chr10	6425	SFRP5	1	0	0	1	0.027
cg15616400	chr1	284723	SLC25A34	0	0	0	1	0.027
cg24105933	chr4	94031	HTRA3	0	1	0	1	0.027
cg21743649	chr11	4928	NUP98	0	0	0	1	0.027
cg00344372	chr4	3083	HGFAC	0	0	0	1	0.027
cg27246571	chr12	3034	HAL	0	0	0	1	0.027
cg12694870	chr12	3242	HPD	0	0	0	1	0.027
cg01770400	chr1	462	SERPINC1	0	0	0	1	0.018
cg13156411	chr3	5745	PTH1R	0	0	0	1	0.018
cg21690892	chr6	2979	GUCA1B	0	0	0	1	0.018
cg23514672	chr16	146279	TEKT5	0	0	0	1	0.018
cg24329717	chr11	5024	P2RX3	0	0	0	1	0.018
cg26147338	chr17	124751	KRBA2	0	0	0	1	0.018
cg06490951	chr18	1068	CETN1	0	1	0	1	0.018
cg16282679	chr6	80864	EGFL8	0	0	0	1	0.018
cg00935388	chr14	122665	RNASE8	0	0	0	1	0.018
cg03140978	chr1	90529	C1orf201	0	0	0	1	0.018
cg22298208	chr7	135927	C7orf34	0	1	1	1	0.018
cg06029655	chr19	1954	MEGF8	0	0	0	1	0.018
cg20342082	chr1	339501	PRSS38	0	1	0	1	0.018
cg05104081	chr18	23255	KIAA0802	0	0	0	1	0.018
cg26136776	chr19	10661	KLF1	0	0	0	1	0.018
cg20199333	chr11	2147	F2	0	0	0	1	0.018
cg27278802	chr11	9973	CCS	0	0	0	1	0.018
cg04720358	chr17	5957	RCVRN	0	1	0	1	0.018
cg09201719	chr10	1586	CYP17A1	0	0	0	1	0.018
cg20059312	chr2	25791	NGEF	0	0	0	1	0.018
cg24650229	chr3	152404	IGSF11	0	0	0	1	0.018
cg15550350	chr3	131890	GRK7	0	0	0	1	0.018
cg23352030	chr20	85441	PRIC285	0	0	0	1	0.018
cg03389164	chr14	51676	ASB2	0	0	0	1	0.018
cg04366367	chr17	2873	GPS1	0	0	0	1	0.018
cg07740640	chr7	168620	BHLHA15	0	0	0	1	0.018
cg23403256	chr18	4152	MBD1	0	0	0	1	0.018
cg07850221	chr19	55851	PSENEN	0	0	0	1	0.018
cg12497692	chr19	27033	ZBTB32	0	0	0	1	0.018
cg14896003	chr11	8045	RASSF7	0	0	0	1	0.018
cg16575408	chr11	4312	MMP1	0	0	0	1	0.018
cg03558807	chr5	114915	NCRNA00219	0	1	0	1	0.018
cg15187606	chr1	10158	PDZK1IP1	0	0	1	1	0.018
cg16913124	chr3	8372	HYAL3	0	1	0	1	0.018
cg12661964	chr17	3430	IFI35	0	0	0	1	0.018
cg14356114	chrX	9506	PAGE4	NA	NA	NA	1	0.018
cg15896447	chr14	29082	CHMP4A	0	0	0	1	0.018
cg04385519	chr16	115	ADCY9	0	0	0	1	0.018
cg10704923	chr6	3010	HIST1H1T	0	0	0	1	0.018
cg19875656	chr3	29122	PRSS50	0	0	0	1	0.018
cg21770617	chr3	131177	FAM3D	0	0	1	1	0.018
cg23106779	chrX	1527	TEX28	0	0	0	1	0.018
cg23326301	chr1	11085	ADAM30	0	0	0	1	0.018
cg03721967	chr13	79774	GRTP1	0	0	0	1	0.018
cg10769011	chr17	8456	FOXN1	0	0	0	1	0.018
cg09034836	chr22	25812	POM121L1P	0	1	0	1	0.018
cg09722555	chr9	10850	CCL27	0	0	0	1	0.018
cg10213812	chr17	8456	FOXN1	0	0	0	1	0.018
cg10335931	chr11	4607	MYBPC3	0	0	0	1	0.018
cg11784281	chr2	165100	C2orf57	0	0	0	1	0.018
cg12529228	chr1	4807	NHLH1	0	0	0	1	0.018
cg14264994	chr20	140690	CTCFL	0	0	0	1	0.018
cg15777570	chr9	10850	CCL27	0	0	0	1	0.018
cg17237881	chr20	79444	BIRC7	0	0	0	1	0.018
cg20747455	chr20	8785	MATN4	0	0	0	1	0.018
cg23919867	chr1	864	RUNX3	0	0	0	1	0.018
cg27573888	chr1	9473	C1orf38	0	0	0	1	0.018
cg01076838	chr19	255043	TMEM86B	0	0	0	1	0.018
cg17291001	chr14	388007	SERPINA13	0	0	0	1	0.018
cg09076584	chr17	124923	FLJ25006	0	0	0	1	0.018
cg11254522	chr1	2268	FGR	0	0	0	1	0.018
cg11827101	chr2	339789	C2orf46	0	0	0	1	0.018
cg22286764	chr3	339883	C3orf35	0	0	0	1	0.018
cg05910970	chr19	1548	CYP2A6	0	0	0	1	0.018
cg26709863	chr17	8678	BECN1	NA	NA	NA	1	0.018
cg18655584	chr11	5002	SLC22A18	0	0	0	1	0.018
cg01872771	chrX	139105	BEND2	0	1	1	1	0.009
cg22568540	chr19	1	A1BG	0	0	0	1	0.009
cg06475327	chr19	1088	CEACAM8	0	0	1	1	0.009
cg01108476	chr6	6954	TCP11	1	0	0	1	0.009
cg06090864	chr19	2864	FFAR1	0	1	1	1	0.009
cg06648029	chr3	8856	NR1I2	0	0	0	1	0.009
cg00434413	chrX	8260	ARD1A	0	0	0	1	0.009
cg23347911	chr11	6199	RPS6KB2	0	1	0	1	0.009
cg00572797	chr1	864	RUNX3	0	0	0	1	0.009
cg08719081	chr1	257	ALX3	1	0	0	1	0.009
cg15344726	chr13	2700	GJA3	0	0	0	1	0.009
cg17736259	chr1	63948	DMRTB1	0	0	0	1	0.009
cg00176879	chr20	5786	PTPRA	0	0	0	1	0.009
cg00215066	chr19	4650	MYO9B	0	0	0	1	0.009
cg00307685	chr1	676	BRDT	0	0	0	1	0.009
cg00327483	chr1	844	CASQ1	0	0	0	1	0.009
cg00344358	chr12	10220	GDF11	0	0	0	1	0.009
cg00537910	chr2	10058	ABCB6	0	0	0	1	0.009
cg00668685	chr12	283375	SLC39A5	0	0	0	1	0.009
cg00702729	chr7	55262	C7orf43	0	0	0	1	0.009
cg00881370	chr19	55908	LOC55908	0	0	0	1	0.009
cg01103836	chr19	4650	MYO9B	0	0	0	1	0.009
cg01127428	chr12	50511	SYCP3	0	0	0	1	0.009
cg01194444	chr1	4656	MYOG	0	0	0	1	0.009
cg01265637	chr20	128653	C20orf141	0	0	0	1	0.009
cg01275830	chr10	79946	C10orf95	0	0	0	1	0.009
cg01489608	chr16	3931	LCAT	0	0	0	1	0.009
cg01708964	chr7	58498	MYL7	0	0	0	1	0.009
cg01991150	chr11	1132	CHRM4	0	0	0	1	0.009
cg02044161	chr3	53833	IL20RB	0	0	0	1	0.009
cg02401149	chr22	1417	CRYBB3	0	0	1	1	0.009
cg02774486	chr2	113457	TUBA3D	0	0	0	1	0.009
cg03113824	chr19	93233	CCDC114	0	0	0	1	0.009
cg03240745	chr19	1954	MEGF8	0	0	0	1	0.009
cg03410718	chr19	400666	FLJ45684	0	0	0	1	0.009
cg03856801	chr11	335	APOA1	0	0	0	1	0.009
cg03931808	chr19	117579	RLN3	0	0	0	1	0.009
cg04109382	chr20	27296	TP53TG5	0	0	0	1	0.009
cg04382920	chr4	83447	SLC25A31	0	1	0	1	0.009
cg04511195	chr19	51343	FZR1	0	0	0	1	0.009
cg04618528	chr17	8689	KRT36	0	0	0	1	0.009
cg04710641	chr6	7936	RDBP	0	0	0	1	0.009
cg04861271	chr14	8106	PABPN1	0	0	0	1	0.009
cg04898512	chr19	10365	KLF2	1	0	0	1	0.009
cg04970994	chr2	7701	ZNF142	0	0	0	1	0.009
cg05261299	chr12	3164	NR4A1	0	1	0	1	0.009
cg05547500	chr18	84203	TXNDC2	0	0	0	1	0.009
cg05646865	chr1	200172	SLFNL1	0	0	0	1	0.009
cg05718253	chr19	55908	LOC55908	0	0	0	1	0.009
cg05750321	chr15	84952	CGNL1	0	0	0	1	0.009
cg05976325	chr22	284912	LOC284912	0	0	0	1	0.009
cg06186808	chr14	161247	FITM1	0	0	0	1	0.009
cg06229674	chr22	164668	APOBEC3H	0	0	0	1	0.009
cg06391660	chr2	1639	DCTN1	0	0	0	1	0.009
cg06429195	chr3	1618	DAZL	0	0	0	1	0.009
cg06435786	chr2	3631	INPP4A	0	0	0	1	0.009
cg06462703	chr12	55743	CHFR	0	0	0	1	0.009
cg06584407	chr1	4878	NPPA	0	0	0	1	0.009
cg06762858	chr7	29992	PILRA	0	0	0	1	0.009
cg06803253	chr3	2779	GNAT1	0	0	0	1	0.009
cg06852744	chr7	165	AEBP1	0	0	0	1	0.009
cg06859828	chr1	8718	TNFRSF25	0	0	0	1	0.009
cg06943865	chr7	23089	PEG10	0	1	0	1	0.009
cg07091552	chr11	7352	UCP3	0	0	0	1	0.009
cg07123548	chr19	147746	HIPK4	0	0	0	1	0.009
cg07433453	chr7	115330	GPR146	0	0	0	1	0.009
cg07614786	chr3	26140	TTLL3	0	0	0	1	0.009
cg07883333	chr1	50848	F11R	0	0	0	1	0.009
cg08095532	chr15	5685	PSMA4	0	0	0	1	0.009
cg08245789	chr22	150350	ENTHD1	0	1	0	1	0.009
cg08304608	chr20	81027	TUBB1	0	0	0	1	0.009
cg08450168	chr1	115273	RAB42	0	0	0	1	0.009
cg09222791	chr16	283847	CCDC79	0	0	0	1	0.009
cg09314766	chr8	2515	ADAM2	0	1	0	1	0.009
cg09494188	chr11	7356	SCGB1A1	0	0	0	1	0.009
cg09799156	chr1	266675	BEST4	0	0	0	1	0.009
cg09869858	chr12	8909	P11	0	0	0	1	0.009
cg10107671	chr19	400666	FLJ45684	0	0	0	1	0.009
cg10207787	chr8	5520	PPP2R2A	0	0	0	1	0.009
cg10298205	chr8	93100	NAPRT1	0	0	0	1	0.009
cg10507231	chr1	5287	PIK3C2B	0	0	0	1	0.009
cg10935064	chr12	50511	SYCP3	0	0	0	1	0.009
cg10967280	chr12	196477	C12orf12	0	1	0	1	0.009
cg11181795	chr17	2874	GPS2	NA	NA	NA	1	0.009
cg11560403	chr1	388730	TMEM81	0	0	0	1	0.009
cg11628026	chr9	10881	ACTL7A	0	0	0	1	0.009
cg11675413	chr13	140432	RNF113B	0	0	0	1	0.009
cg11832543	chr1	84066	C1orf49	0	0	0	1	0.009
cg12080812	chr11	23625	FAM89B	0	0	0	1	0.009
cg12371177	chr12	55200	PLEKHG6	0	0	0	1	0.009
cg12441964	chr16	283847	CCDC79	0	0	0	1	0.009
cg12510502	chr11	5002	SLC22A18	0	0	0	1	0.009
cg12564962	chr21	53820	DSCR6	1	0	0	1	0.009
cg12888113	chr1	10747	MASP2	0	0	0	1	0.009
cg13074965	chr11	10432	RBM14	0	0	0	1	0.009
cg13083810	chr6	5460	POU5F1	0	0	0	1	0.009
cg13107169	chr4	55728	N4BP2	NA	NA	NA	1	0.009
cg13247990	chr16	91807	MYLK3	0	0	0	1	0.009
cg13338132	chr12	196472	FAM71C	0	1	1	1	0.009
cg13383572	chr12	5554	PRH1	0	0	0	1	0.009
cg13466487	chr5	134147	CMBL	0	0	0	1	0.009
cg13543096	chr16	79153	GDPD3	0	0	0	1	0.009
cg13550608	chr3	7869	SEMA3B	0	0	0	1	0.009
cg13649728	chr4	83447	SLC25A31	0	1	0	1	0.009
cg13735697	chr1	4656	MYOG	0	0	0	1	0.009
cg13847113	chr19	163154	PRR22	0	0	0	1	0.009
cg14226064	chr20	27296	TP53TG5	0	0	0	1	0.009
cg14299800	chr9	27348	TOR1B	0	0	0	1	0.009
cg14341418	chr6	55937	APOM	0	0	0	1	0.009
cg14401897	chr19	22904	SBNO2	0	0	0	1	0.009
cg14517922	chr7	6922	TCEB1P	0	0	0	1	0.009
cg14519134	chr3	132243	H1FOO	0	0	0	1	0.009
cg14523284	chr5	3596	IL13	0	0	0	1	0.009
cg14736210	chr20	3745	KCNB1	1	1	1	1	0.009
cg14975238	chr7	168620	BHLHA15	0	0	0	1	0.009
cg15278682	chr10	6865	TACR2	0	0	0	1	0.009
cg15341760	chr1	148645	C1orf211	0	0	0	1	0.009
cg15357639	chr3	4968	OGG1	0	0	0	1	0.009
cg15448599	chr3	132228	C3orf45	0	0	0	1	0.009
cg15637528	chr6	222826	C6orf146	0	0	0	1	0.009
cg16098170	chr19	126306	JSRP1	0	0	0	1	0.009
cg16107172	chr19	10998	SLC27A5	0	0	0	1	0.009
cg16408565	chr9	5005	ORM2	0	0	0	1	0.009
cg16582174	chr5	9685	CLINT1	0	0	0	1	0.009
cg16759954	chr17	83394	PITPNM3	1	0	0	1	0.009
cg16949889	chr5	373863	DND1	0	0	0	1	0.009
cg17522601	chr12	55743	CHFR	0	0	0	1	0.009
cg17524886	chr12	55743	CHFR	0	0	0	1	0.009
cg17749520	chr17	3674	ITGA2B	0	0	0	1	0.009
cg17759354	chr16	6559	SLC12A3	0	0	0	1	0.009
cg18034859	chr20	85366	MYLK2	0	0	0	1	0.009
cg18043280	chr17	314	AOC2	0	0	0	1	0.009
cg18202456	chr1	128209	KLF17	0	0	0	1	0.009
cg18338293	chr11	582	BBS1	0	0	0	1	0.009
cg18343862	chr11	10894	LYVE1	0	0	0	1	0.009
cg18368125	chr16	146456	TMED6	0	0	0	1	0.009
cg18422795	chr20	128497	C20orf165	0	0	0	1	0.009
cg18692273	chr1	7139	TNNT2	0	0	0	1	0.009
cg19035993	chr22	253143	C22orf30	0	0	0	1	0.009
cg19215261	chr5	83884	SLC25A2	0	0	0	1	0.009
cg19240938	chr11	5002	SLC22A18	0	0	0	1	0.009
cg19394737	chr2	255101	CCDC108	0	0	1	1	0.009
cg19420968	chr1	3061	HCRTR1	0	0	0	1	0.009
cg19426277	chr7	115330	GPR146	0	0	0	1	0.009
cg19447496	chr13	5925	RB1	0	0	0	1	0.009
cg19622372	chr22	1564	CYP2D7P1	0	0	0	1	0.009
cg19781251	chr7	23089	PEG10	0	1	0	1	0.009
cg19944367	chr9	5998	RGS3	0	0	0	1	0.009
cg19971655	chr1	7809	BSND	1	0	0	1	0.009
cg20616836	chr19	166	AES	0	0	0	1	0.009
cg20707345	chr16	65057	ACD	0	0	0	1	0.009
cg20891917	chr7	3475	IFRD1	0	0	0	1	0.009
cg20972553	chr14	122953	JDP2	0	0	0	1	0.009
cg21223353	chr1	10218	ANGPTL7	0	0	0	1	0.009
cg21270593	chr7	23089	PEG10	0	1	0	1	0.009
cg21377793	chr15	10099	TSPAN3	0	0	0	1	0.009
cg21489873	chr9	81571	C9orf45	0	0	0	1	0.009
cg21588305	chr20	4826	NNAT	0	0	0	1	0.009
cg21626086	chr6	221481	C6orf81	0	0	0	1	0.009
cg21951612	chr3	22808	MRAS	0	0	0	1	0.009
cg22381955	chr12	55743	CHFR	0	0	0	1	0.009
cg23487586	chr16	197196	TMEM148	0	1	0	1	0.009
cg24331079	chr2	6775	STAT4	0	0	0	1	0.009
cg24560809	chr2	150696	PROM2	0	0	0	1	0.009
cg25092540	chr9	23511	NUP188	0	0	0	1	0.009
cg25425005	chr16	3050	HBZ	1	0	0	1	0.009
cg25457027	chr2	5624	PROC	1	0	0	1	0.009
cg25461905	chr1	84066	C1orf49	0	0	0	1	0.009
cg25612145	chr7	56164	STK31	0	0	0	1	0.009
cg25636075	chr3	90407	TMEM41A	0	0	0	1	0.009
cg25852715	chr11	114879	OSBPL5	0	0	0	1	0.009
cg26158980	chr11	57053	CHRNA10	0	0	0	1	0.009
cg26427308	chr2	51052	PRLH	0	0	0	1	0.009
cg26609691	chr12	55743	CHFR	0	0	0	1	0.009
cg26698580	chr16	65057	ACD	0	0	0	1	0.009
cg27431396	chr20	128864	C20orf144	0	0	0	1	0.009
cg27475152	chr6	696	BTN1A1	0	0	0	1	0.009
cg27557796	chr6	80740	LY6G6C	0	0	0	1	0.009
cg26317111	chr1	148581	UBE2U	0	0	0	1	0.009
